# Supplementary material for: Survivin Autoantibodies Are Not Elevated in Lung Cancer When Assayed Controlling for Specificity and Smoking Status
Source: Oxford University Press journal article supplement (doi:10.1158/2326-6066.cir-14-0176), 2016-01-11
Supplement: 23266066cir140176-sup-137227_3_supp_3160895_nv8g1z.xlsx [file 23266066cir140176-sup-137227_3_supp_3160895_nv8g1z.xlsx]

## Sheet: Proteins in gel band 1 to 5
Supplementary Table S2. Scaffold 'Sample view' of all proteins and protein clusters identified in protein band 1 to 5
Scaffold 'Sample view' of all proteins and protein clusters, respectively, identified in band 1 to 5 above 1% peptide false discovery rate (FDR) and 1 % protein FDR. Similar proteins were collapsed in protein clusters, and the accession numbers of the first protein and the number of proteins per cluster (number in brackets) are listed. Columns Band 1 to Band 5 contain the number of unique peptide…
					Number of unique peptides identified (< 1% protein FDR and < 1% peptide FDR)
rank	Target	Protein cluster description	Accession	MW	Band1	Band2	Band3	Band4	Band5
757	**	Baculoviral IAP repeat-containing protein 5 OS=Homo sapiens GN=BIRC5 PE=1 SV=3	O15392	16 kDa		1	1
14	*	40S ribosomal protein S18 OS=Homo sapiens GN=RPS18 PE=1 SV=3	P62269	18 kDa	8	15	8	3	6
37	*	40S ribosomal protein S16 OS=Homo sapiens GN=RPS16 PE=1 SV=2	P62249	16 kDa	6	3	1	13	1
37	*	Cluster of 60S ribosomal protein L26 OS=Homo sapiens GN=RPL26 PE=1 SV=1 (P61254)	P61254 [2]	17 kDa	17	1	4		2
25	*	40S ribosomal protein S11 OS=Homo sapiens GN=RPS11 PE=1 SV=3	P62280	18 kDa	17	5	3		2
25	*	60S ribosomal protein L23 OS=Homo sapiens GN=RPL23 PE=1 SV=1	P62829	15 kDa	5	3	4	6	9
25	*	60S ribosomal protein L28 OS=Homo sapiens GN=RPL28 PE=1 SV=3	P46779	16 kDa	8	11	4		4
29	*	60S ribosomal protein L23a OS=Homo sapiens GN=RPL23A PE=1 SV=1	P62750	18 kDa	14	3	5	3	1
32	*	60S ribosomal protein L32 OS=Homo sapiens GN=RPL32 PE=1 SV=2	P62910	16 kDa	3	15	6		1
37	*	40S ribosomal protein S19 OS=Homo sapiens GN=RPS19 PE=1 SV=2	P39019	16 kDa	3	2	3	8	8
46	*	Cluster of 60S ribosomal protein L36a OS=Homo sapiens GN=RPL36A PE=1 SV=2 (P83881)	P83881 [2]	12 kDa	3	4	5	7	3
57	*	60S ribosomal protein L12 OS=Homo sapiens GN=RPL12 PE=1 SV=1	P30050	18 kDa	8	7	1	3	1
150	*	40S ribosomal protein S14 OS=Homo sapiens GN=RPS14 PE=1 SV=3	P62263	16 kDa	5	3	1	2
57	*	60S ribosomal protein L34 OS=Homo sapiens GN=RPL34 PE=1 SV=3	P49207	13 kDa	3	4	3	7	3
57	*	60S ribosomal protein L27 OS=Homo sapiens GN=RPL27 PE=1 SV=2	P61353	16 kDa	4	6	7	2	1
57	*	40S ribosomal protein S3 OS=Homo sapiens GN=RPS3 PE=1 SV=2	P23396	27 kDa	4	5	6	1	4
57	*	60S ribosomal protein L35a OS=Homo sapiens GN=RPL35A PE=1 SV=2	P18077	13 kDa	5	3	3	1	8
57	*	60S ribosomal protein L13 OS=Homo sapiens GN=RPL13 PE=1 SV=4	P26373	24 kDa	4	3	6	3	4
69	*	Cluster of 40S ribosomal protein S10 OS=Homo sapiens GN=RPS10 PE=1 SV=1 (P46783)	P46783 [2]	19 kDa	13	3	3
69	*	60S ribosomal protein L31 OS=Homo sapiens GN=RPL31 PE=1 SV=1	P62899	14 kDa	2	2	8	5	2
69	*	40S ribosomal protein S23 OS=Homo sapiens GN=RPS23 PE=1 SV=3	P62266	16 kDa	2	2	8	2	5
77	*	60S ribosomal protein L22 OS=Homo sapiens GN=RPL22 PE=1 SV=2	P35268	15 kDa	2	2	6	7	1
77	*	40S ribosomal protein S17 OS=Homo sapiens GN=RPS17 PE=1 SV=2	P08708 (+1)	16 kDa	6	7	4		1
211	*	60S acidic ribosomal protein P2 OS=Homo sapiens GN=RPLP2 PE=1 SV=1	P05387	12 kDa	1	1	3	3	1
84	*	60S ribosomal protein L35 OS=Homo sapiens GN=RPL35 PE=1 SV=2	P42766	15 kDa	2	7	6		2
89	*	40S ribosomal protein S13 OS=Homo sapiens GN=RPS13 PE=1 SV=2	P62277	17 kDa	2	8	5		1
89	*	28S ribosomal protein S28, mitochondrial OS=Homo sapiens GN=MRPS28 PE=1 SV=1	Q9Y2Q9	21 kDa	6	7	2	1
101	*	40S ribosomal protein S25 OS=Homo sapiens GN=RPS25 PE=1 SV=1	P62851	14 kDa	4	3	6		2
113	*	60S ribosomal protein L11 OS=Homo sapiens GN=RPL11 PE=1 SV=2	P62913	20 kDa	9	2	1		2
113	*	60S ribosomal protein L24 OS=Homo sapiens GN=RPL24 PE=1 SV=1	P83731	18 kDa	8	3	2	1
113	*	40S ribosomal protein S24 OS=Homo sapiens GN=RPS24 PE=1 SV=1	P62847	15 kDa	1	6	6		1
127	*	Cluster of Ubiquitin-40S ribosomal protein S27a OS=Homo sapiens GN=RPS27A PE=1 SV=2 (P62979)	P62979 [2]	18 kDa	6	2		1	4
127	*	40S ribosomal protein S15a OS=Homo sapiens GN=RPS15A PE=1 SV=2	P62244	15 kDa	3	3	2	1	4
127	*	39S ribosomal protein L17, mitochondrial OS=Homo sapiens GN=MRPL17 PE=1 SV=1	Q9NRX2	20 kDa	8	4	1
139	*	40S ribosomal protein S3a OS=Homo sapiens GN=RPS3A PE=1 SV=2	P61247	30 kDa	6	3	1	2
139	*	60S ribosomal protein L30 OS=Homo sapiens GN=RPL30 PE=1 SV=2	P62888	13 kDa	3		2		7
150	*	60S ribosomal protein L27a OS=Homo sapiens GN=RPL27A PE=1 SV=2	P46776	17 kDa	3	6	2
150	*	40S ribosomal protein S8 OS=Homo sapiens GN=RPS8 PE=1 SV=2	P62241	24 kDa	5	5			1
150	*	60S ribosomal protein L36 OS=Homo sapiens GN=RPL36 PE=1 SV=3	Q9Y3U8	12 kDa	3	1		1	6
150	*	39S ribosomal protein L18, mitochondrial OS=Homo sapiens GN=MRPL18 PE=1 SV=1	Q9H0U6	21 kDa	8	2	1
150	*	60S ribosomal protein L18a OS=Homo sapiens GN=RPL18A PE=1 SV=2	Q02543	21 kDa	7	3	1
150	*	39S ribosomal protein L22, mitochondrial OS=Homo sapiens GN=MRPL22 PE=1 SV=1	Q9NWU5	24 kDa	8	3
150	*	60S ribosomal protein L21 OS=Homo sapiens GN=RPL21 PE=1 SV=2	P46778	19 kDa	5	4			2
177	*	60S ribosomal protein L18 OS=Homo sapiens GN=RPL18 PE=1 SV=2	Q07020	22 kDa	4	2	2		2
177	*	40S ribosomal protein S9 OS=Homo sapiens GN=RPS9 PE=1 SV=3	P46781	23 kDa	5	2	3
177	*	40S ribosomal protein S15 OS=Homo sapiens GN=RPS15 PE=1 SV=2	P62841	17 kDa	2	7	1
177	*	40S ribosomal protein S20 OS=Homo sapiens GN=RPS20 PE=1 SV=1	P60866	13 kDa	1	1	1	4	3
177	*	40S ribosomal protein S6 OS=Homo sapiens GN=RPS6 PE=1 SV=1	P62753	29 kDa	3	2	3		2
211	*	40S ribosomal protein S12 OS=Homo sapiens GN=RPS12 PE=1 SV=3	P25398	15 kDa	2	1	1	1	4
211	*	60S ribosomal protein L3 OS=Homo sapiens GN=RPL3 PE=1 SV=2	P39023	46 kDa	1	5	2		1
211	*	60S ribosomal protein L7 OS=Homo sapiens GN=RPL7 PE=1 SV=1	P18124	29 kDa	5	1	1	1	1
211	*	39S ribosomal protein L21, mitochondrial OS=Homo sapiens GN=MRPL21 PE=1 SV=2	Q7Z2W9	23 kDa	8	1
242	*	Cluster of 40S ribosomal protein S26 OS=Homo sapiens GN=RPS26 PE=1 SV=3 (P62854)	P62854 [2]	13 kDa	1		2	3	2
242	*	60S ribosomal protein L15 OS=Homo sapiens GN=RPL15 PE=1 SV=2	P61313	24 kDa	3	2	1		2
242	*	60S ribosomal protein L14 OS=Homo sapiens GN=RPL14 PE=1 SV=4	P50914	23 kDa	3	1	1	2	1
242	*	39S ribosomal protein L43, mitochondrial OS=Homo sapiens GN=MRPL43 PE=1 SV=1	Q8N983	23 kDa	1	4	3
242	*	28S ribosomal protein S11, mitochondrial OS=Homo sapiens GN=MRPS11 PE=1 SV=2	P82912	21 kDa	1	5	2
242	*	28S ribosomal protein S18a, mitochondrial OS=Homo sapiens GN=MRPS18A PE=1 SV=1	Q9NVS2	22 kDa	5	3
275	*	60S ribosomal protein L8 OS=Homo sapiens GN=RPL8 PE=1 SV=2	P62917	28 kDa	3	3	1
275	*	40S ribosomal protein SA OS=Homo sapiens GN=RPSA PE=1 SV=4	P08865	33 kDa	2	1	2	1	1
275	*	Cluster of 40S ribosomal protein S4, X isoform OS=Homo sapiens GN=RPS4X PE=1 SV=2 (P62701)	P62701 [2]	30 kDa	2	2	2		1
275	*	60S ribosomal protein L17 OS=Homo sapiens GN=RPL17 PE=1 SV=3	P18621	21 kDa	1	3	2		1
275	*	39S ribosomal protein L49, mitochondrial OS=Homo sapiens GN=MRPL49 PE=1 SV=1	Q13405	19 kDa			4	3
275	*	39S ribosomal protein L13, mitochondrial OS=Homo sapiens GN=MRPL13 PE=1 SV=1	Q9BYD1	21 kDa	6	1
275	*	60S ribosomal protein L29 OS=Homo sapiens GN=RPL29 PE=1 SV=2	P47914	18 kDa	1	2	2	1	1
275	*	28S ribosomal protein S25, mitochondrial OS=Homo sapiens GN=MRPS25 PE=1 SV=1	P82663	20 kDa	7
334	*	39S ribosomal protein L20, mitochondrial OS=Homo sapiens GN=MRPL20 PE=1 SV=1	Q9BYC9	17 kDa	4	2
334	*	39S ribosomal protein L12, mitochondrial OS=Homo sapiens GN=MRPL12 PE=1 SV=2	P52815	21 kDa	6
334	*	60S ribosomal protein L37a OS=Homo sapiens GN=RPL37A PE=1 SV=2	P61513	10 kDa	1	2	1		2
400	*	60S ribosomal protein L5 OS=Homo sapiens GN=RPL5 PE=1 SV=3	P46777	34 kDa	2	3
400	*	40S ribosomal protein S2 OS=Homo sapiens GN=RPS2 PE=1 SV=2	P15880	31 kDa	1	2	1	1
400	*	60S ribosomal protein L6 OS=Homo sapiens GN=RPL6 PE=1 SV=3	Q02878	33 kDa	2	2			1
400	*	40S ribosomal protein S5 OS=Homo sapiens GN=RPS5 PE=1 SV=4	P46782	23 kDa	4	1
492	*	60S ribosomal protein L7a OS=Homo sapiens GN=RPL7A PE=1 SV=2	P62424	30 kDa	1		3
492	*	40S ribosomal protein S7 OS=Homo sapiens GN=RPS7 PE=1 SV=1	P62081	22 kDa	1	1	1		1
492	*	60S ribosomal protein L19 OS=Homo sapiens GN=RPL19 PE=1 SV=1	P84098	23 kDa	3	1
492	*	Ribosomal RNA processing protein 1 homolog B OS=Homo sapiens GN=RRP1B PE=1 SV=3	Q14684	84 kDa	2	1	1
492	*	28S ribosomal protein S10, mitochondrial OS=Homo sapiens GN=MRPS10 PE=1 SV=2	P82664	23 kDa		4
492	*	Cluster of 60S ribosomal protein L13a OS=Homo sapiens GN=RPL13A PE=1 SV=2 (P40429)	P40429 [2]	24 kDa	2	2
492	*	40S ribosomal protein S30 OS=Homo sapiens GN=FAU PE=1 SV=1	P62861	7 kDa	2	1	1
492	*	60S acidic ribosomal protein P1 OS=Homo sapiens GN=RPLP1 PE=1 SV=1	P05386	12 kDa			2	2
609	*	Cluster of 60S ribosomal protein L10 OS=Homo sapiens GN=RPL10 PE=1 SV=4 (P27635)	P27635 [2]	25 kDa	3
609	*	39S ribosomal protein L30, mitochondrial OS=Homo sapiens GN=MRPL30 PE=1 SV=1	Q8TCC3	19 kDa			2	1
609	*	Cluster of 60S acidic ribosomal protein P0 OS=Homo sapiens GN=RPLP0 PE=1 SV=1 (P05388)	P05388	34 kDa		1	1	1
609	*	39S ribosomal protein L23, mitochondrial OS=Homo sapiens GN=MRPL23 PE=1 SV=1	Q16540	18 kDa	1	1	1
609	*	28S ribosomal protein S24, mitochondrial OS=Homo sapiens GN=MRPS24 PE=1 SV=1	Q96EL2	19 kDa				2	1
609	*	28S ribosomal protein S16, mitochondrial OS=Homo sapiens GN=MRPS16 PE=1 SV=1	Q9Y3D3	15 kDa					3
609	*	Ribosomal L1 domain-containing protein 1 OS=Homo sapiens GN=RSL1D1 PE=1 SV=3	O76021	55 kDa	1	2
609	*	Ribosomal RNA processing protein 36 homolog OS=Homo sapiens GN=RRP36 PE=1 SV=1	Q96EU6	30 kDa	2	1
757	*	40S ribosomal protein S21 OS=Homo sapiens GN=RPS21 PE=1 SV=1	P63220	9 kDa	1	1
757	*	Ribosomal RNA small subunit methyltransferase NEP1 OS=Homo sapiens GN=EMG1 PE=1 SV=4	Q92979	27 kDa			1		1
757	*	28S ribosomal protein S17, mitochondrial OS=Homo sapiens GN=MRPS17 PE=2 SV=1	Q9Y2R5	15 kDa			2
757	*	39S ribosomal protein L48, mitochondrial OS=Homo sapiens GN=MRPL48 PE=1 SV=2	Q96GC5	24 kDa	2
757	*	40S ribosomal protein S28 OS=Homo sapiens GN=RPS28 PE=1 SV=1	P62857	8 kDa		1			1
757	*	39S ribosomal protein L40, mitochondrial OS=Homo sapiens GN=MRPL40 PE=1 SV=1	Q9NQ50	24 kDa	2
945	*	60S ribosomal protein L10a OS=Homo sapiens GN=RPL10A PE=1 SV=2	P62906	25 kDa	1
945	*	39S ribosomal protein L50, mitochondrial OS=Homo sapiens GN=MRPL50 PE=1 SV=2	Q8N5N7	18 kDa					1
945	*	39S ribosomal protein L46, mitochondrial OS=Homo sapiens GN=MRPL46 PE=1 SV=1	Q9H2W6	32 kDa		1
945	*	60S ribosomal protein L4 OS=Homo sapiens GN=RPL4 PE=1 SV=5	P36578	48 kDa			1
945	*	60S ribosomal protein L9 OS=Homo sapiens GN=RPL9 PE=1 SV=1	P32969	22 kDa	1
945	*	39S ribosomal protein L32, mitochondrial OS=Homo sapiens GN=MRPL32 PE=1 SV=1	Q9BYC8	21 kDa					1
945	*	28S ribosomal protein S14, mitochondrial OS=Homo sapiens GN=MRPS14 PE=1 SV=1	O60783	15 kDa					1
1		Cluster of Keratin, type II cytoskeletal 2 epidermal OS=Homo sapiens GN=KRT2 PE=1 SV=2 (P35908)	P35908 [12]	65 kDa	11	35	47	28	35
2		Keratin, type II cytoskeletal 1 OS=Homo sapiens GN=KRT1 PE=1 SV=6	P04264	66 kDa	44	23	26	25	22
3		Cluster of Keratin, type I cytoskeletal 16 OS=Homo sapiens GN=KRT16 PE=1 SV=4 (P08779)	P08779 [7]	51 kDa	64	14	23	9	13
4		Keratin, type I cytoskeletal 9 OS=Homo sapiens GN=KRT9 PE=1 SV=3	P35527	62 kDa	32	17	13	18	14
5		Cluster of Keratin, type I cytoskeletal 10 OS=Homo sapiens GN=KRT10 PE=1 SV=6 (P13645)	P13645 [4]	59 kDa	29	17	16	13	15
6		Cluster of Vimentin OS=Homo sapiens GN=VIM PE=1 SV=4 (P08670)	P08670 [5]	54 kDa	22	15	21	14	13
7		Serum albumin OS=Homo sapiens GN=ALB PE=1 SV=2	P02768	69 kDa	24	14	17	12	13
8		Cluster of Heat shock protein HSP 90-alpha OS=Homo sapiens GN=HSP90AA1 PE=1 SV=5 (P07900)	P07900 [4]	85 kDa	23	9	15	6	7
9		Desmoplakin OS=Homo sapiens GN=DSP PE=1 SV=3	P15924	332 kDa	36	6	6	2	5
10		Cluster of Tubulin beta chain OS=Homo sapiens GN=TUBB PE=1 SV=2 (P07437)	P07437 [8]	50 kDa	16	11	12	6	8
20		Cluster of Heat shock 70 kDa protein 1A/1B OS=Homo sapiens GN=HSPA1A PE=1 SV=5 (P08107)	P08107 [3]	70 kDa	19	1	1	3	9
13		Cluster of Histone H2B type 1-K OS=Homo sapiens GN=HIST1H2BK PE=1 SV=3 (O60814)	O60814 [9]	14 kDa	6	5	1	15	14
11		Cluster of Histone H1.3 OS=Homo sapiens GN=HIST1H1D PE=1 SV=2 (P16402)	P16402 [4]	22 kDa	13	13	12	4	7
12		Cluster of Peptidyl-prolyl cis-trans isomerase A OS=Homo sapiens GN=PPIA PE=1 SV=2 (P62937)	P62937	18 kDa	7	8	17	9	3
21		Cluster of Heat shock cognate 71 kDa protein OS=Homo sapiens GN=HSPA8 PE=1 SV=1 (P11142)	P11142 [2]	71 kDa	13	9	1	3	6
15		Cluster of Nucleoside diphosphate kinase A OS=Homo sapiens GN=NME1 PE=1 SV=1 (P15531)	P15531 [3]	17 kDa	13	13	8	1	2
15		Histone H4 OS=Homo sapiens GN=HIST1H4A PE=1 SV=2	P62805	11 kDa	9	8	7	6	7
17		Cluster of Actin, cytoplasmic 1 OS=Homo sapiens GN=ACTB PE=1 SV=1 (P60709)	P60709 [8]	42 kDa	8	8	7	5	8
17		Cofilin-1 OS=Homo sapiens GN=CFL1 PE=1 SV=3	P23528	19 kDa	14	17	2	1	2
17		Cluster of Pyruvate kinase PKM OS=Homo sapiens GN=PKM PE=1 SV=4 (P14618)	P14618	58 kDa	12	7	7	2	8
32		60 kDa heat shock protein, mitochondrial OS=Homo sapiens GN=HSPD1 PE=1 SV=2	P10809	61 kDa	1	7	6	5	6
21		Cluster of Stathmin OS=Homo sapiens GN=STMN1 PE=1 SV=3 (P16949)	P16949	17 kDa	9	14	6	1	2
23		Cluster of Heterogeneous nuclear ribonucleoproteins C1/C2 OS=Homo sapiens GN=HNRNPC PE=1 SV=4 (P07910)	P07910 [2]	34 kDa	7	8	6	5	4
24		Cluster of L-lactate dehydrogenase B chain OS=Homo sapiens GN=LDHB PE=1 SV=2 (P07195)	P07195 [2]	37 kDa	6	8	6	3	6
69		Cluster of Transgelin-2 OS=Homo sapiens GN=TAGLN2 PE=1 SV=3 (P37802)	P37802	22 kDa	1	8	5	2	3
25		Cluster of Histone H3.1 OS=Homo sapiens GN=HIST1H3A PE=1 SV=2 (P68431)	P68431 [3]	15 kDa	4	5	9	5	4
29		Cluster of Myosin light polypeptide 6 OS=Homo sapiens GN=MYL6 PE=1 SV=2 (P60660)	P60660 [2]	17 kDa	3	4	4	9	6
29		Keratin, type II cytoskeletal 4 OS=Homo sapiens GN=KRT4 PE=1 SV=4	P19013	57 kDa	16	2	5	2	1
32		Peptidyl-prolyl cis-trans isomerase B OS=Homo sapiens GN=PPIB PE=1 SV=2	P23284	24 kDa	18	4	3
32		Destrin OS=Homo sapiens GN=DSTN PE=1 SV=3	P60981	19 kDa	3	13	9
32		14-3-3 protein epsilon OS=Homo sapiens GN=YWHAE PE=1 SV=1	P62258	29 kDa	8	4	5	4	4
37		Serotransferrin OS=Homo sapiens GN=TF PE=1 SV=3	P02787	77 kDa	7	4	5	2	6
37		Cluster of Annexin A2 OS=Homo sapiens GN=ANXA2 PE=1 SV=2 (P07355)	P07355 [2]	39 kDa	9	4	5	2	4
101		Nucleolin OS=Homo sapiens GN=NCL PE=1 SV=3	P19338	77 kDa	1	8	4	1	1
42		Hornerin OS=Homo sapiens GN=HRNR PE=1 SV=2	Q86YZ3	282 kDa	11	3	4	2	3
42		Elongation factor 1-alpha 1 OS=Homo sapiens GN=EEF1A1 PE=1 SV=1	P68104 (+1)	50 kDa	8	3	5	2	5
42		T-complex protein 1 subunit theta OS=Homo sapiens GN=CCT8 PE=1 SV=4	P50990	60 kDa	9	4	4	3	3
42		78 kDa glucose-regulated protein OS=Homo sapiens GN=HSPA5 PE=1 SV=2	P11021	72 kDa	8	3	5	3	4
46		Cluster of Eukaryotic translation initiation factor 5A-1 OS=Homo sapiens GN=EIF5A PE=1 SV=2 (P63241)	P63241 [3]	17 kDa	5	11	5		1
127		Filamin-A OS=Homo sapiens GN=FLNA PE=1 SV=4	P21333	281 kDa	1	5	6		1
46		Keratin, type II cytoskeletal 1b OS=Homo sapiens GN=KRT77 PE=2 SV=3	Q7Z794	62 kDa	14	2	3	1	2
49		Carbamoyl-phosphate synthase [ammonia], mitochondrial OS=Homo sapiens GN=CPS1 PE=1 SV=2	P31327	165 kDa	4	5	4	3	5
49		Cluster of Tubulin alpha-1B chain OS=Homo sapiens GN=TUBA1B PE=1 SV=1 (P68363)	P68363 [4]	50 kDa	6	6	4	3	2
49		Malate dehydrogenase, mitochondrial OS=Homo sapiens GN=MDH2 PE=1 SV=3	P40926	36 kDa	4	4	4	4	5
49		Cluster of Elongation factor 2 OS=Homo sapiens GN=EEF2 PE=1 SV=4 (P13639)	P13639	95 kDa	8	5	4	2	2
49		Calmodulin OS=Homo sapiens GN=CALM1 PE=1 SV=2	P62158	17 kDa	4	7	9		1
49		Profilin-1 OS=Homo sapiens GN=PFN1 PE=1 SV=2	P07737	15 kDa	5	4	6	1	5
49		Cytochrome c oxidase subunit 4 isoform 1, mitochondrial OS=Homo sapiens GN=COX4I1 PE=1 SV=1	P13073	20 kDa	3	3	6	6	3
49		Fatty acid synthase OS=Homo sapiens GN=FASN PE=1 SV=3	P49327	273 kDa	7	2	6		6
57		Alpha-enolase OS=Homo sapiens GN=ENO1 PE=1 SV=2	P06733	47 kDa	5	4	8		3
57		Heterogeneous nuclear ribonucleoproteins A2/B1 OS=Homo sapiens GN=HNRNPA2B1 PE=1 SV=2	P22626	37 kDa	6	7	3	1	3
57		Signal recognition particle 14 kDa protein OS=Homo sapiens GN=SRP14 PE=1 SV=2	P37108	15 kDa	2	2	7	6	3
57		Cluster of Histone H2A type 1-J OS=Homo sapiens GN=HIST1H2AJ PE=1 SV=3 (Q99878)	Q99878 [5]	14 kDa	3	2	2	4	9
57		Desmoglein-1 OS=Homo sapiens GN=DSG1 PE=1 SV=2	Q02413	114 kDa	13	2	3	1	1
57		Trafficking protein particle complex subunit 3 OS=Homo sapiens GN=TRAPPC3 PE=1 SV=1	O43617	20 kDa	13	6	1
69		Cluster of Endoplasmin OS=Homo sapiens GN=HSP90B1 PE=1 SV=1 (P14625)	P14625	92 kDa	7	3	3	2	4
69		Cluster of Eukaryotic initiation factor 4A-I OS=Homo sapiens GN=EIF4A1 PE=1 SV=1 (P60842)	P60842 [2]	46 kDa	7	2	5	3	2
69		Cluster of 14-3-3 protein theta OS=Homo sapiens GN=YWHAQ PE=1 SV=1 (P27348)	P27348 [4]	28 kDa	6	4	4	2	3
69		Cluster of Heterogeneous nuclear ribonucleoprotein A1 OS=Homo sapiens GN=HNRNPA1 PE=1 SV=5 (P09651)	P09651 [2]	39 kDa	6	4	4	2	3
77		Cluster of Ubiquitin-conjugating enzyme E2 variant 2 OS=Homo sapiens GN=UBE2V2 PE=1 SV=4 (Q15819)	Q15819 [2]	16 kDa	1	8	9
211		Programmed cell death protein 5 OS=Homo sapiens GN=PDCD5 PE=1 SV=3	O14737	14 kDa	1	1	1	5	1
77		Protein canopy homolog 2 OS=Homo sapiens GN=CNPY2 PE=1 SV=1	Q9Y2B0	21 kDa	6	5	6		1
77		Cluster of ADP-ribosylation factor 1 OS=Homo sapiens GN=ARF1 PE=1 SV=2 (P84077)	P84077 [2]	21 kDa	11	4	1		2
77		Cluster of RNA-binding motif protein, X chromosome OS=Homo sapiens GN=RBMX PE=1 SV=3 (P38159)	P38159 [2]	42 kDa	6	2	4	2	4
77		Cofilin-2 OS=Homo sapiens GN=CFL2 PE=1 SV=1	Q9Y281	19 kDa	9	7	1		1
84		Cluster of Rho-related GTP-binding protein RhoG OS=Homo sapiens GN=RHOG PE=1 SV=1 (P84095)	P84095 [5]	21 kDa	14	1			2
84		Cluster of Eukaryotic translation initiation factor 1A, X-chromosomal OS=Homo sapiens GN=EIF1AX PE=1 SV=2 (P47813)	P47813	16 kDa	8	6	2		1
84		ATP synthase subunit beta, mitochondrial OS=Homo sapiens GN=ATP5B PE=1 SV=3	P06576	57 kDa	5	7	2		3
84		Junction plakoglobin OS=Homo sapiens GN=JUP PE=1 SV=3	P14923	82 kDa	12	2	2		1
89		Activated RNA polymerase II transcriptional coactivator p15 OS=Homo sapiens GN=SUB1 PE=1 SV=3	P53999	14 kDa	2	5	6	2	1
89		Single-stranded DNA-binding protein, mitochondrial OS=Homo sapiens GN=SSBP1 PE=1 SV=1	Q04837	17 kDa	1	3	2	3	7
89		Myosin regulatory light chain 12B OS=Homo sapiens GN=MYL12B PE=1 SV=2	O14950 (+1)	20 kDa	9	4	1		2
89		Low molecular weight phosphotyrosine protein phosphatase OS=Homo sapiens GN=ACP1 PE=1 SV=3	P24666	18 kDa	1	7	6		2
89		Prefoldin subunit 2 OS=Homo sapiens GN=PFDN2 PE=1 SV=1	Q9UHV9	17 kDa		8	5	1	2
89		Histone deacetylase complex subunit SAP18 OS=Homo sapiens GN=SAP18 PE=1 SV=1	O00422	18 kDa	9	7
89		DNA-directed RNA polymerases I, II, and III subunit RPABC3 OS=Homo sapiens GN=POLR2H PE=1 SV=4	P52434	17 kDa	1	7	5	1	2
89		Mitochondrial import receptor subunit TOM22 homolog OS=Homo sapiens GN=TOMM22 PE=1 SV=3	Q9NS69	16 kDa	6	7	2	1
275		Lactoylglutathione lyase OS=Homo sapiens GN=GLO1 PE=1 SV=4	Q04760	21 kDa	1	3	2		1
89		ATP-dependent RNA helicase A OS=Homo sapiens GN=DHX9 PE=1 SV=4	Q08211	141 kDa	7	7	1		1
89		Lactotransferrin OS=Homo sapiens GN=LTF PE=1 SV=6	P02788	78 kDa	11		5
101		Glyceraldehyde-3-phosphate dehydrogenase OS=Homo sapiens GN=GAPDH PE=1 SV=3	P04406	36 kDa	4	2	5	1	3
101		N-alpha-acetyltransferase 50 OS=Homo sapiens GN=NAA50 PE=1 SV=1	Q9GZZ1	19 kDa	9	5	1
101		Small nuclear ribonucleoprotein Sm D2 OS=Homo sapiens GN=SNRPD2 PE=1 SV=1	P62316	14 kDa	4	3	2	1	5
101		Fructose-bisphosphate aldolase A OS=Homo sapiens GN=ALDOA PE=1 SV=2	P04075	39 kDa	5	2	3	1	4
101		Ubiquitin-conjugating enzyme E2 N OS=Homo sapiens GN=UBE2N PE=1 SV=1	P61088	17 kDa	2	1	4	8
101		S-phase kinase-associated protein 1 OS=Homo sapiens GN=SKP1 PE=1 SV=2	P63208	19 kDa	6	2	2	2	3
101		Cluster of Hemoglobin subunit beta OS=Homo sapiens GN=HBB PE=1 SV=2 (P68871)	P68871 [2]	16 kDa	2	3	4	2	4
101		Filaggrin-2 OS=Homo sapiens GN=FLG2 PE=1 SV=1	Q5D862	248 kDa	7	2	3	1	2
101		Thioredoxin OS=Homo sapiens GN=TXN PE=1 SV=3	P10599	12 kDa	3	3	5	1	3
334		ADP-ribosylation factor 5 OS=Homo sapiens GN=ARF5 PE=1 SV=2	P84085	21 kDa	1	3	1		1
101		CGG triplet repeat-binding protein 1 OS=Homo sapiens GN=CGGBP1 PE=1 SV=2	Q9UFW8	19 kDa	12	3
113		Peroxiredoxin-1 OS=Homo sapiens GN=PRDX1 PE=1 SV=1	Q06830	22 kDa	7	3			4
113		ATP synthase subunit alpha, mitochondrial OS=Homo sapiens GN=ATP5A1 PE=1 SV=1	P25705	60 kDa	4	1	2	2	5
113		Heterogeneous nuclear ribonucleoprotein M OS=Homo sapiens GN=HNRNPM PE=1 SV=3	P52272	78 kDa	7		2	1	4
113		Creatine kinase B-type OS=Homo sapiens GN=CKB PE=1 SV=1	P12277	43 kDa	6	3	3		2
113		Fatty acid-binding protein, epidermal OS=Homo sapiens GN=FABP5 PE=1 SV=3	Q01469	15 kDa	5	2	3	1	3
113		T-complex protein 1 subunit gamma OS=Homo sapiens GN=CCT3 PE=1 SV=4	P49368	61 kDa	6	3	1		4
113		Mesencephalic astrocyte-derived neurotrophic factor OS=Homo sapiens GN=MANF PE=1 SV=3	P55145	21 kDa	4	7	3
113		Myosin-9 OS=Homo sapiens GN=MYH9 PE=1 SV=4	P35579	227 kDa	5	2	4	1	2
113		Receptor expression-enhancing protein 5 OS=Homo sapiens GN=REEP5 PE=1 SV=3	Q00765	21 kDa	6	7	1
113		Histone H2A.Z OS=Homo sapiens GN=H2AFZ PE=1 SV=2	P0C0S5	14 kDa	3	3	3	2	3
113		Cluster of Ig alpha-1 chain C region OS=Homo sapiens GN=IGHA1 PE=1 SV=2 (P01876)	P01876 [2]	38 kDa	8	1	5
127		Tubulin-specific chaperone A OS=Homo sapiens GN=TBCA PE=1 SV=3	O75347	13 kDa	2				11
127		Peroxiredoxin-5, mitochondrial OS=Homo sapiens GN=PRDX5 PE=1 SV=4	P30044	22 kDa	2	4	4	1	2
127		Peptidyl-prolyl cis-trans isomerase H OS=Homo sapiens GN=PPIH PE=1 SV=1	O43447	19 kDa	6	6	1
127		T-complex protein 1 subunit delta OS=Homo sapiens GN=CCT4 PE=1 SV=4	P50991	58 kDa	2	5	3		3
127		Sorting nexin-3 OS=Homo sapiens GN=SNX3 PE=1 SV=3	O60493	19 kDa	2	9	2
127		Stress-70 protein, mitochondrial OS=Homo sapiens GN=HSPA9 PE=1 SV=2	P38646	74 kDa	3	5	3	1	1
127		Ubiquitin-conjugating enzyme E2 L3 OS=Homo sapiens GN=UBE2L3 PE=1 SV=1	P68036	18 kDa	1	8	4
127		Cluster of Spliceosome RNA helicase DDX39B OS=Homo sapiens GN=DDX39B PE=1 SV=1 (Q13838)	Q13838 [2]	49 kDa	3	4	4		2
139		Prelamin-A/C OS=Homo sapiens GN=LMNA PE=1 SV=1	P02545	74 kDa	3	2	4	2	1
139		Annexin A5 OS=Homo sapiens GN=ANXA5 PE=1 SV=2	P08758	36 kDa	2	4	3	1	2
139		Aspartate aminotransferase, mitochondrial OS=Homo sapiens GN=GOT2 PE=1 SV=3	P00505	48 kDa	6	2	3		1
609		Phospholipid hydroperoxide glutathione peroxidase, mitochondrial OS=Homo sapiens GN=GPX4 PE=1 SV=3	P36969	22 kDa	1	2
139		NADH dehydrogenase [ubiquinone] 1 alpha subcomplex subunit 13 OS=Homo sapiens GN=NDUFA13 PE=1 SV=3	Q9P0J0	17 kDa		1	5	5	1
139		Lysozyme C OS=Homo sapiens GN=LYZ PE=1 SV=1	P61626	17 kDa	6	1	3		2
139		Desmocollin-1 OS=Homo sapiens GN=DSC1 PE=1 SV=2	Q08554	100 kDa	6	4	1		1
139		PEST proteolytic signal-containing nuclear protein OS=Homo sapiens GN=PCNP PE=1 SV=2	Q8WW12	19 kDa	4	3	2		3
609		Keratin, type II cytoskeletal 78 OS=Homo sapiens GN=KRT78 PE=2 SV=2	Q8N1N4	57 kDa	1		1	1
139		AP-1 complex subunit sigma-2 OS=Homo sapiens GN=AP1S2 PE=1 SV=1	P56377	19 kDa	4	5	2	1
139		Polymeric immunoglobulin receptor OS=Homo sapiens GN=PIGR PE=1 SV=4	P01833	83 kDa	6		6
150		Laminin subunit gamma-1 OS=Homo sapiens GN=LAMC1 PE=1 SV=3	P11047	178 kDa	2	3	4		2
150		Laminin subunit beta-1 OS=Homo sapiens GN=LAMB1 PE=1 SV=2	P07942	198 kDa	2	1	3	1	4
150		Superoxide dismutase [Cu-Zn] OS=Homo sapiens GN=SOD1 PE=1 SV=2	P00441	16 kDa	6	4	1
150		Protein disulfide-isomerase A4 OS=Homo sapiens GN=PDIA4 PE=1 SV=2	P13667	73 kDa	5	1	3		2
150		Cluster of ADP/ATP translocase 3 OS=Homo sapiens GN=SLC25A6 PE=1 SV=4 (P12236)	P12236 [3]	33 kDa	3	2	2	1	3
150		Poly [ADP-ribose] polymerase 1 OS=Homo sapiens GN=PARP1 PE=1 SV=4	P09874	113 kDa	1	2	4	3	1
150		Deoxyuridine 5'-triphosphate nucleotidohydrolase, mitochondrial OS=Homo sapiens GN=DUT PE=1 SV=4	P33316	27 kDa	8	1	2
150		GTP-binding nuclear protein Ran OS=Homo sapiens GN=RAN PE=1 SV=3	P62826	24 kDa	4	4	1	1	1
150		Cluster of Small ubiquitin-related modifier 2 OS=Homo sapiens GN=SUMO2 PE=1 SV=3 (P61956)	P61956 [2]	11 kDa	1	1	5	2	2
150		UPF0556 protein C19orf10 OS=Homo sapiens GN=C19orf10 PE=1 SV=1	Q969H8	19 kDa	2	1	1	4	3
150		Prefoldin subunit 5 OS=Homo sapiens GN=PFDN5 PE=1 SV=2	Q99471	17 kDa	1		6	4
150		Allograft inflammatory factor 1-like OS=Homo sapiens GN=AIF1L PE=1 SV=1	Q9BQI0	17 kDa		5	5	1
150		Prostaglandin E synthase 3 OS=Homo sapiens GN=PTGES3 PE=1 SV=1	Q15185	19 kDa	9	1	1
150		ADP-ribosylation factor 4 OS=Homo sapiens GN=ARF4 PE=1 SV=3	P18085	21 kDa	9	2
150		Protein BUD31 homolog OS=Homo sapiens GN=BUD31 PE=1 SV=2	P41223	17 kDa	1	6	4
150		Transcription intermediary factor 1-beta OS=Homo sapiens GN=TRIM28 PE=1 SV=5	Q13263	89 kDa	6	4			1
757		Peptidyl-tRNA hydrolase 2, mitochondrial OS=Homo sapiens GN=PTRH2 PE=1 SV=1	Q9Y3E5	19 kDa	1	1
150		Cysteine and glycine-rich protein 2 OS=Homo sapiens GN=CSRP2 PE=1 SV=3	Q16527	21 kDa	11
150		Cluster of Vesicle-associated membrane protein 3 OS=Homo sapiens GN=VAMP3 PE=1 SV=3 (Q15836)	Q15836 [2]	11 kDa	1	2	3		5
150		Sorting nexin-12 OS=Homo sapiens GN=SNX12 PE=1 SV=3	Q9UMY4	20 kDa	3	6	2
177		Cluster of Phosphoglycerate kinase 1 OS=Homo sapiens GN=PGK1 PE=1 SV=3 (P00558)	P00558 [2]	45 kDa	5	1	1		3
177		Heterogeneous nuclear ribonucleoprotein K OS=Homo sapiens GN=HNRNPK PE=1 SV=1	P61978	51 kDa	5	1	2	1	1
177		Triosephosphate isomerase OS=Homo sapiens GN=TPI1 PE=1 SV=3	P60174	31 kDa	2	1	4	1	2
177		Nucleophosmin OS=Homo sapiens GN=NPM1 PE=1 SV=2	P06748	33 kDa	3	3	1	2	1
177		Cellular nucleic acid-binding protein OS=Homo sapiens GN=CNBP PE=1 SV=1	P62633	19 kDa	6	3			1
177		NEDD8-conjugating enzyme Ubc12 OS=Homo sapiens GN=UBE2M PE=1 SV=1	P61081	21 kDa	7	2			1
177		Cluster of Poly(rC)-binding protein 1 OS=Homo sapiens GN=PCBP1 PE=1 SV=2 (Q15365)	Q15365 [2]	37 kDa	3	2	2	1	2
177		Peroxiredoxin-2 OS=Homo sapiens GN=PRDX2 PE=1 SV=5	P32119	22 kDa	4	3			3
177		Inorganic pyrophosphatase OS=Homo sapiens GN=PPA1 PE=1 SV=2	Q15181	33 kDa	8	1			1
177		NADH dehydrogenase [ubiquinone] 1 alpha subcomplex assembly factor 3 OS=Homo sapiens GN=NDUFAF3 PE=1 SV=1	Q9BU61	20 kDa		2	3	4	1
177		6-phosphogluconate dehydrogenase, decarboxylating OS=Homo sapiens GN=PGD PE=1 SV=3	P52209	53 kDa	1	2	3	1	3
177		14-3-3 protein zeta/delta OS=Homo sapiens GN=YWHAZ PE=1 SV=1	P63104	28 kDa	2	2	3	2	1
177		Ragulator complex protein LAMTOR1 OS=Homo sapiens GN=LAMTOR1 PE=1 SV=2	Q6IAA8	18 kDa	3	5	1		1
177		Transitional endoplasmic reticulum ATPase OS=Homo sapiens GN=VCP PE=1 SV=4	P55072	89 kDa	5	3	1		1
177		Dermcidin OS=Homo sapiens GN=DCD PE=1 SV=2	P81605	11 kDa	3	2	2	1	2
177		X-ray repair cross-complementing protein 5 OS=Homo sapiens GN=XRCC5 PE=1 SV=3	P13010	83 kDa	3	3	3		1
177		Thioredoxin domain-containing protein 12 OS=Homo sapiens GN=TXNDC12 PE=1 SV=1	O95881	19 kDa	6	4
177		NudC domain-containing protein 2 OS=Homo sapiens GN=NUDCD2 PE=1 SV=1	Q8WVJ2	18 kDa	3	3	4
177		Heterogeneous nuclear ribonucleoprotein H3 OS=Homo sapiens GN=HNRNPH3 PE=1 SV=2	P31942	37 kDa	3	3	2		2
177		Transcription elongation factor B polypeptide 2 OS=Homo sapiens GN=TCEB2 PE=1 SV=1	Q15370	13 kDa		2	6		2
177		Catalase OS=Homo sapiens GN=CAT PE=1 SV=3	P04040	60 kDa	5	1	2	1	1
177		PDZ and LIM domain protein 1 OS=Homo sapiens GN=PDLIM1 PE=1 SV=4	O00151	36 kDa	2	1	3		4
177		DNA replication licensing factor MCM3 OS=Homo sapiens GN=MCM3 PE=1 SV=3	P25205	91 kDa	4	2	3		1
177		Keratin, type I cytoskeletal 18 OS=Homo sapiens GN=KRT18 PE=1 SV=2	P05783	48 kDa	2	2	4	1	1
177		Cluster of Microtubule-associated protein RP/EB family member 1 OS=Homo sapiens GN=MAPRE1 PE=1 SV=3 (Q15691)	Q15691 [2]	30 kDa	3	2	4	1
177		Histone H1x OS=Homo sapiens GN=H1FX PE=1 SV=1	Q92522	22 kDa	4	3	2		1
177		Vesicle-associated membrane protein-associated protein A OS=Homo sapiens GN=VAPA PE=1 SV=3	Q9P0L0	28 kDa	6	1	1		2
177		Mucin-5B OS=Homo sapiens GN=MUC5B PE=1 SV=3	Q9HC84	596 kDa	2		8
177		RNA-binding protein Raly OS=Homo sapiens GN=RALY PE=1 SV=1	Q9UKM9	32 kDa	9	1
211		Cluster of Keratin, type I cuticular Ha4 OS=Homo sapiens GN=KRT34 PE=2 SV=2 (O76011)	O76011 [7]	49 kDa	7	1	1
211		Heterogeneous nuclear ribonucleoprotein U OS=Homo sapiens GN=HNRNPU PE=1 SV=6	Q00839	91 kDa	3	2	1		3
211		Translocon-associated protein subunit delta OS=Homo sapiens GN=SSR4 PE=1 SV=1	P51571	19 kDa	3	4	2
211		Cluster of Alpha-actinin-4 OS=Homo sapiens GN=ACTN4 PE=1 SV=2 (O43707)	O43707 [2]	105 kDa	5	2	1		1
211		Signal recognition particle 19 kDa protein OS=Homo sapiens GN=SRP19 PE=1 SV=3	P09132	16 kDa		5	4
211		Endothelial differentiation-related factor 1 OS=Homo sapiens GN=EDF1 PE=1 SV=1	O60869	16 kDa	1	6	1		1
211		Proliferating cell nuclear antigen OS=Homo sapiens GN=PCNA PE=1 SV=1	P12004	29 kDa	2	3	1	2	1
211		T-complex protein 1 subunit alpha OS=Homo sapiens GN=TCP1 PE=1 SV=1	P17987	60 kDa	2	4	3
211		Peptidyl-prolyl cis-trans isomerase F, mitochondrial OS=Homo sapiens GN=PPIF PE=1 SV=1	P30405	22 kDa	7	2
211		Protein mago nashi homolog 2 OS=Homo sapiens GN=MAGOHB PE=1 SV=1	Q96A72	17 kDa			3	6
211		Small nuclear ribonucleoprotein Sm D3 OS=Homo sapiens GN=SNRPD3 PE=1 SV=1	P62318	14 kDa	2	1	1	2	3
211		SUMO-conjugating enzyme UBC9 OS=Homo sapiens GN=UBE2I PE=1 SV=1	P63279	18 kDa	1	5	3
211		Nucleoside diphosphate kinase 3 OS=Homo sapiens GN=NME3 PE=1 SV=2	Q13232	19 kDa	5	3	1
211		Keratin, type II cytoskeletal 80 OS=Homo sapiens GN=KRT80 PE=1 SV=2	Q6KB66	51 kDa	6	1		1	1
211		Nuclear migration protein nudC OS=Homo sapiens GN=NUDC PE=1 SV=1	Q9Y266	38 kDa	2	5			2
211		Cluster of Alpha-synuclein OS=Homo sapiens GN=SNCA PE=1 SV=1 (P37840)	P37840 [2]	14 kDa		6	3
211		Actin-related protein 2/3 complex subunit 3 OS=Homo sapiens GN=ARPC3 PE=1 SV=3	O15145	21 kDa	7	1		1
211		Rho GDP-dissociation inhibitor 1 OS=Homo sapiens GN=ARHGDIA PE=1 SV=3	P52565	23 kDa	3	3	3
211		Haptoglobin OS=Homo sapiens GN=HP PE=1 SV=1	P00738	45 kDa	6		2		1
211		Adenylyl cyclase-associated protein 1 OS=Homo sapiens GN=CAP1 PE=1 SV=5	Q01518	52 kDa	5	4
211		Treacle protein OS=Homo sapiens GN=TCOF1 PE=1 SV=3	Q13428	152 kDa	5	1	2		1
211		Malignant T-cell-amplified sequence 1 OS=Homo sapiens GN=MCTS1 PE=1 SV=1	Q9ULC4	21 kDa	9
211		Serpin B6 OS=Homo sapiens GN=SERPINB6 PE=1 SV=3	P35237	43 kDa	3	2	2		2
211		Heterogeneous nuclear ribonucleoprotein D0 OS=Homo sapiens GN=HNRNPD PE=1 SV=1	Q14103	38 kDa	2	2	3		2
211		Chromobox protein homolog 3 OS=Homo sapiens GN=CBX3 PE=1 SV=4	Q13185	21 kDa	4	1	2		2
242		Cytochrome c OS=Homo sapiens GN=CYCS PE=1 SV=2	P99999	12 kDa	2	1	2	1	2
242		Proteasome subunit beta type-5 OS=Homo sapiens GN=PSMB5 PE=1 SV=3	P28074	28 kDa	2	1		3	2
242		Protein disulfide-isomerase A3 OS=Homo sapiens GN=PDIA3 PE=1 SV=4	P30101	57 kDa	2	1	1		4
242		Actin-related protein 2/3 complex subunit 4 OS=Homo sapiens GN=ARPC4 PE=1 SV=3	P59998	20 kDa	5	2	1
242		Voltage-dependent anion-selective channel protein 2 OS=Homo sapiens GN=VDAC2 PE=1 SV=2	P45880	32 kDa	3	3	2
242		Protein disulfide-isomerase OS=Homo sapiens GN=P4HB PE=1 SV=3	P07237	57 kDa	2	2		1	3
242		Hemoglobin subunit alpha OS=Homo sapiens GN=HBA1 PE=1 SV=2	P69905	15 kDa	1		2	2	3
242		Eukaryotic translation initiation factor 2 subunit 1 OS=Homo sapiens GN=EIF2S1 PE=1 SV=3	P05198	36 kDa	2	5	1
242		NADH dehydrogenase [ubiquinone] iron-sulfur protein 7, mitochondrial OS=Homo sapiens GN=NDUFS7 PE=1 SV=3	O75251	24 kDa	5	3
242		Adenosylhomocysteinase OS=Homo sapiens GN=AHCY PE=1 SV=4	P23526	48 kDa	4	2	1		1
242		Cluster of Centrin-2 OS=Homo sapiens GN=CETN2 PE=1 SV=1 (P41208)	P41208	20 kDa	7	1
242		Alpha-1-antitrypsin OS=Homo sapiens GN=SERPINA1 PE=1 SV=3	P01009	47 kDa	3	1	2	1	1
242		Vesicle-trafficking protein SEC22b OS=Homo sapiens GN=SEC22B PE=1 SV=4	O75396	25 kDa	4	2	1		1
242		Arginase-1 OS=Homo sapiens GN=ARG1 PE=1 SV=2	P05089	35 kDa	5	1		1	1
242		Prefoldin subunit 4 OS=Homo sapiens GN=PFDN4 PE=1 SV=1	Q9NQP4	15 kDa		5	3
242		ADP-ribosylation factor-like protein 2 OS=Homo sapiens GN=ARL2 PE=1 SV=4	P36404	21 kDa	6	2
242		Keratinocyte proline-rich protein OS=Homo sapiens GN=KPRP PE=1 SV=1	Q5T749	64 kDa	5	2	1
242		Cluster of Lamina-associated polypeptide 2, isoforms beta/gamma OS=Homo sapiens GN=TMPO PE=1 SV=2 (P42167)	P42167	51 kDa	3	3	2
242		Nucleolar and coiled-body phosphoprotein 1 OS=Homo sapiens GN=NOLC1 PE=1 SV=2	Q14978	74 kDa	4	1	1	1	1
242		Ubiquinone biosynthesis protein COQ7 homolog OS=Homo sapiens GN=COQ7 PE=1 SV=3	Q99807	24 kDa	8
242		Cluster of Histidine--tRNA ligase, cytoplasmic OS=Homo sapiens GN=HARS PE=1 SV=2 (P12081)	P12081 [2]	57 kDa	4	2			2
242		Programmed cell death protein 6 OS=Homo sapiens GN=PDCD6 PE=1 SV=1	O75340	22 kDa	8
242		Macrophage migration inhibitory factor OS=Homo sapiens GN=MIF PE=1 SV=4	P14174	12 kDa	3	2	1	1	1
242		Tumor protein D53 OS=Homo sapiens GN=TPD52L1 PE=1 SV=1	Q16890	22 kDa	5	2	1
242		Suprabasin OS=Homo sapiens GN=SBSN PE=2 SV=2	Q6UWP8	61 kDa	6	1	1
242		DNA ligase 3 OS=Homo sapiens GN=LIG3 PE=1 SV=2	P49916	113 kDa	1	2	2	2	1
242		Calpain small subunit 1 OS=Homo sapiens GN=CAPNS1 PE=1 SV=1	P04632	28 kDa	2	3	3
275		Cluster of Tropomyosin alpha-3 chain OS=Homo sapiens GN=TPM3 PE=1 SV=2 (P06753)	P06753 [3]	33 kDa	1		4		2
275		Cluster of Transforming protein RhoA OS=Homo sapiens GN=RHOA PE=1 SV=1 (P61586)	P61586 [2]	22 kDa	6				1
275		Ceruloplasmin OS=Homo sapiens GN=CP PE=1 SV=1	P00450	122 kDa		1	3	2	1
275		Peroxiredoxin-6 OS=Homo sapiens GN=PRDX6 PE=1 SV=3	P30041	25 kDa	2	1	2	1	1
275		D-3-phosphoglycerate dehydrogenase OS=Homo sapiens GN=PHGDH PE=1 SV=4	O43175	57 kDa	4	3
275		Protein DJ-1 OS=Homo sapiens GN=PARK7 PE=1 SV=2	Q99497	20 kDa	3	1	1	2
275		Peptidyl-prolyl cis-trans isomerase FKBP4 OS=Homo sapiens GN=FKBP4 PE=1 SV=3	Q02790	52 kDa	5	1	1
275		Peptidyl-prolyl cis-trans isomerase-like 1 OS=Homo sapiens GN=PPIL1 PE=1 SV=1	Q9Y3C6	18 kDa		4	3
275		Cluster of Cyclin-dependent kinase 1 OS=Homo sapiens GN=CDK1 PE=1 SV=3 (P06493)	P06493 [3]	34 kDa	4	1	1		1
275		Coactosin-like protein OS=Homo sapiens GN=COTL1 PE=1 SV=3	Q14019	16 kDa		1	1		5
275		Cluster of Alcohol dehydrogenase 1A OS=Homo sapiens GN=ADH1A PE=1 SV=2 (P07327)	P07327 [3]	40 kDa		2	2	1	2
275		Ubiquitin-like modifier-activating enzyme 1 OS=Homo sapiens GN=UBA1 PE=1 SV=3	P22314	118 kDa	2	2	2		1
275		Gamma-glutamylcyclotransferase OS=Homo sapiens GN=GGCT PE=1 SV=1	O75223	21 kDa	4	1			2
275		Rab GDP dissociation inhibitor beta OS=Homo sapiens GN=GDI2 PE=1 SV=2	P50395	51 kDa	1	4	2
275		Ubiquitin-like protein 4A OS=Homo sapiens GN=UBL4A PE=1 SV=1	P11441	18 kDa	1	5	1
275		Elongation factor 1-gamma OS=Homo sapiens GN=EEF1G PE=1 SV=3	P26641	50 kDa	2	2	3
275		Peptidyl-prolyl cis-trans isomerase NIMA-interacting 1 OS=Homo sapiens GN=PIN1 PE=1 SV=1	Q13526	18 kDa	1	3	3
275		Cluster of ATP-dependent RNA helicase DDX3X OS=Homo sapiens GN=DDX3X PE=1 SV=3 (O00571)	O00571	73 kDa	4	1	1		1
275		Cluster of Ras-related protein Rab-11B OS=Homo sapiens GN=RAB11B PE=1 SV=4 (Q15907)	Q15907	24 kDa	5	2
275		Nucleoside diphosphate kinase, mitochondrial OS=Homo sapiens GN=NME4 PE=1 SV=1	O00746	21 kDa		4	3
275		7,8-dihydro-8-oxoguanine triphosphatase OS=Homo sapiens GN=NUDT1 PE=1 SV=3	P36639	23 kDa	4	3
275		Elongation factor 1-delta OS=Homo sapiens GN=EEF1D PE=1 SV=5	P29692	31 kDa	1		3	1	2
275		Ubiquitin carboxyl-terminal hydrolase isozyme L1 OS=Homo sapiens GN=UCHL1 PE=1 SV=2	P09936	25 kDa	2	2	2		1
275		Sorcin OS=Homo sapiens GN=SRI PE=1 SV=1	P30626	22 kDa	3	2	1		1
275		Annexin A1 OS=Homo sapiens GN=ANXA1 PE=1 SV=2	P04083	39 kDa	4		2		1
275		Gem-associated protein 6 OS=Homo sapiens GN=GEMIN6 PE=1 SV=1	Q8WXD5	19 kDa	1	3	3
275		Lysosomal alpha-glucosidase OS=Homo sapiens GN=GAA PE=1 SV=4	P10253	105 kDa	4	2	1
275		1,2-dihydroxy-3-keto-5-methylthiopentene dioxygenase OS=Homo sapiens GN=ADI1 PE=1 SV=1	Q9BV57	21 kDa	6	1
275		Clathrin heavy chain 1 OS=Homo sapiens GN=CLTC PE=1 SV=5	Q00610	192 kDa	2	2	2		1
275		Dual specificity protein phosphatase 3 OS=Homo sapiens GN=DUSP3 PE=1 SV=1	P51452	20 kDa	6	1
275		CDGSH iron-sulfur domain-containing protein 2 OS=Homo sapiens GN=CISD2 PE=1 SV=1	Q8N5K1	15 kDa		1	2	4
275		U1 small nuclear ribonucleoprotein A OS=Homo sapiens GN=SNRPA PE=1 SV=3	P09012	31 kDa		2	1	1	3
275		Cyclin-dependent kinase 4 inhibitor C OS=Homo sapiens GN=CDKN2C PE=1 SV=1	P42773	18 kDa			7
275		Plakophilin-1 OS=Homo sapiens GN=PKP1 PE=1 SV=2	Q13835	83 kDa	6				1
275		Lipocalin-1 OS=Homo sapiens GN=LCN1 PE=1 SV=1	P31025	19 kDa	4	2	1
275		Coiled-coil domain-containing protein 124 OS=Homo sapiens GN=CCDC124 PE=1 SV=1	Q96CT7	26 kDa	1	1	1	1	3
275		LIM and SH3 domain protein 1 OS=Homo sapiens GN=LASP1 PE=1 SV=2	Q14847	30 kDa	3	4
275		Polymerase delta-interacting protein 3 OS=Homo sapiens GN=POLDIP3 PE=1 SV=2	Q9BY77	46 kDa	4	1	1		1
275		ADP-ribosylation factor 6 OS=Homo sapiens GN=ARF6 PE=1 SV=2	P62330	20 kDa	3	4
275		Histone H1.0 OS=Homo sapiens GN=H1F0 PE=1 SV=3	P07305	21 kDa	2	2	1		2
275		AP-1 complex subunit sigma-1A OS=Homo sapiens GN=AP1S1 PE=1 SV=1	P61966	19 kDa	2	5
275		Plasminogen receptor (KT) OS=Homo sapiens GN=PLGRKT PE=1 SV=1	Q9HBL7	17 kDa			4	3
275		Chromobox protein homolog 5 OS=Homo sapiens GN=CBX5 PE=1 SV=1	P45973	22 kDa		1	1	1	4
275		Hematological and neurological expressed 1-like protein OS=Homo sapiens GN=HN1L PE=1 SV=1	Q9H910	20 kDa	2	1	3	1
275		Transmembrane protein 160 OS=Homo sapiens GN=TMEM160 PE=1 SV=1	Q9NX00	20 kDa	3	1	3
275		Splicing factor, proline- and glutamine-rich OS=Homo sapiens GN=SFPQ PE=1 SV=2	P23246	76 kDa	2	2	2	1
275		Lamin-B receptor OS=Homo sapiens GN=LBR PE=1 SV=2	Q14739	71 kDa	4		2	1
275		Heterogeneous nuclear ribonucleoprotein A/B OS=Homo sapiens GN=HNRNPAB PE=1 SV=2	Q99729	36 kDa	2	2	2	1
275		14-3-3 protein sigma OS=Homo sapiens GN=SFN PE=1 SV=1	P31947	28 kDa	4	1	2
275		BPI fold-containing family B member 1 OS=Homo sapiens GN=BPIFB1 PE=1 SV=1	Q8TDL5	52 kDa	2		5
334		Proliferation-associated protein 2G4 OS=Homo sapiens GN=PA2G4 PE=1 SV=3	Q9UQ80	44 kDa	4	1			1
334		Cluster of Heterogeneous nuclear ribonucleoprotein R OS=Homo sapiens GN=HNRNPR PE=1 SV=1 (O43390)	O43390 [2]	71 kDa	2	2	2
334		NADH dehydrogenase [ubiquinone] 1 beta subcomplex subunit 7 OS=Homo sapiens GN=NDUFB7 PE=1 SV=4	P17568	16 kDa	3	2	1
334		Apolipoprotein B-100 OS=Homo sapiens GN=APOB PE=1 SV=2	P04114	516 kDa	1	1	2	1	1
334		Epididymal secretory protein E1 OS=Homo sapiens GN=NPC2 PE=1 SV=1	P61916	17 kDa	2	2	2
334		Cluster of DNA topoisomerase 2-alpha OS=Homo sapiens GN=TOP2A PE=1 SV=3 (P11388)	P11388 [2]	174 kDa	2	2		1	1
334		Nuclear cap-binding protein subunit 2 OS=Homo sapiens GN=NCBP2 PE=1 SV=1	P52298	18 kDa	1	1	3	1
334		Voltage-dependent anion-selective channel protein 1 OS=Homo sapiens GN=VDAC1 PE=1 SV=2	P21796	31 kDa	2	1	2		1
334		GTP-binding protein Rheb OS=Homo sapiens GN=RHEB PE=1 SV=1	Q15382	20 kDa		6
334		Clusterin OS=Homo sapiens GN=CLU PE=1 SV=1	P10909	52 kDa	2	1	1	1	1
334		Phosphatidylethanolamine-binding protein 1 OS=Homo sapiens GN=PEBP1 PE=1 SV=3	P30086	21 kDa	5	1
334		Cyclin-dependent kinase inhibitor 2A, isoforms 1/2/3 OS=Homo sapiens GN=CDKN2A PE=1 SV=2	P42771	17 kDa		4	1		1
334		RNA-binding protein 14 OS=Homo sapiens GN=RBM14 PE=1 SV=2	Q96PK6	69 kDa	2		1	1	2
334		Serine/arginine-rich splicing factor 9 OS=Homo sapiens GN=SRSF9 PE=1 SV=1	Q13242	26 kDa	1	4	1
334		X-ray repair cross-complementing protein 6 OS=Homo sapiens GN=XRCC6 PE=1 SV=2	P12956	70 kDa	3	1	1		1
334		Cluster of Glia maturation factor beta OS=Homo sapiens GN=GMFB PE=1 SV=2 (P60983)	P60983 [2]	17 kDa		6
334		Neudesin OS=Homo sapiens GN=NENF PE=1 SV=1	Q9UMX5	19 kDa		1	5
334		Cluster of Polyadenylate-binding protein 4 OS=Homo sapiens GN=PABPC4 PE=1 SV=1 (Q13310)	Q13310 [2]	71 kDa		3	1		2
334		Splicing factor 3B subunit 3 OS=Homo sapiens GN=SF3B3 PE=1 SV=4	Q15393	136 kDa	5	1
334		O-acetyl-ADP-ribose deacetylase 1 OS=Homo sapiens GN=OARD1 PE=1 SV=2	Q9Y530	17 kDa			6
334		Calreticulin OS=Homo sapiens GN=CALR PE=1 SV=1	P27797	48 kDa	1	2	2		1
334		Peroxisomal multifunctional enzyme type 2 OS=Homo sapiens GN=HSD17B4 PE=1 SV=3	P51659	80 kDa	3	2	1
334		Apoptosis regulator BAX OS=Homo sapiens GN=BAX PE=1 SV=1	Q07812	21 kDa	2	2	1		1
334		Angiotensinogen OS=Homo sapiens GN=AGT PE=1 SV=1	P01019	53 kDa	1	1	2	2
334		Signal peptidase complex catalytic subunit SEC11A OS=Homo sapiens GN=SEC11A PE=1 SV=1	P67812	21 kDa	3	3
334		Neutral alpha-glucosidase AB OS=Homo sapiens GN=GANAB PE=1 SV=3	Q14697	107 kDa	4				2
334		26S protease regulatory subunit 8 OS=Homo sapiens GN=PSMC5 PE=1 SV=1	P62195	46 kDa	1	2	1	1	1
334		Serum amyloid P-component OS=Homo sapiens GN=APCS PE=1 SV=2	P02743	25 kDa	1	1	2		2
334		Small nuclear ribonucleoprotein-associated proteins B and B' OS=Homo sapiens GN=SNRPB PE=1 SV=2	P14678	25 kDa		2	2		2
334		Cluster of Coiled-coil-helix-coiled-coil-helix domain-containing protein 2, mitochondrial OS=Homo sapiens GN=CHCHD2 PE=1 SV=1 (Q9Y6H1)	Q9Y6H1 [2]	16 kDa	3	3
334		Importin subunit beta-1 OS=Homo sapiens GN=KPNB1 PE=1 SV=2	Q14974	97 kDa	1	3	2
334		Four and a half LIM domains protein 1 OS=Homo sapiens GN=FHL1 PE=1 SV=4	Q13642	36 kDa	2	1	2		1
334		Mitochondrial import inner membrane translocase subunit Tim21 OS=Homo sapiens GN=TIMM21 PE=1 SV=1	Q9BVV7	28 kDa	4	2
334		CD59 glycoprotein OS=Homo sapiens GN=CD59 PE=1 SV=1	P13987	14 kDa	2	2	2
334		Iron-sulfur cluster assembly enzyme ISCU, mitochondrial OS=Homo sapiens GN=ISCU PE=1 SV=2	Q9H1K1	18 kDa	2				4
334		Ganglioside GM2 activator OS=Homo sapiens GN=GM2A PE=1 SV=4	P17900	21 kDa	4	2
334		Mitochondrial import receptor subunit TOM20 homolog OS=Homo sapiens GN=TOMM20 PE=1 SV=1	Q15388	16 kDa			1	4	1
334		Serine-threonine kinase receptor-associated protein OS=Homo sapiens GN=STRAP PE=1 SV=1	Q9Y3F4	38 kDa	2	2	2
334		NADH dehydrogenase [ubiquinone] 1 beta subcomplex subunit 8, mitochondrial OS=Homo sapiens GN=NDUFB8 PE=1 SV=1	O95169	22 kDa	4	2
334		Cluster of Core histone macro-H2A.1 OS=Homo sapiens GN=H2AFY PE=1 SV=4 (O75367)	O75367	40 kDa	1	1	1	1	2
334		Cold shock domain-containing protein E1 OS=Homo sapiens GN=CSDE1 PE=1 SV=2	O75534	89 kDa	1		5
334		Src substrate cortactin OS=Homo sapiens GN=CTTN PE=1 SV=2	Q14247	62 kDa	3	2			1
334		Huntingtin-interacting protein K OS=Homo sapiens GN=HYPK PE=1 SV=2	Q9NX55	15 kDa			2	3	1
334		Caspase-14 OS=Homo sapiens GN=CASP14 PE=1 SV=2	P31944	28 kDa	4		2
334		Mimitin, mitochondrial OS=Homo sapiens GN=NDUFAF2 PE=1 SV=1	Q8N183	20 kDa	4		2
334		Spectrin beta chain, non-erythrocytic 1 OS=Homo sapiens GN=SPTBN1 PE=1 SV=2	Q01082	275 kDa	2	2	2
334		Zinc-alpha-2-glycoprotein OS=Homo sapiens GN=AZGP1 PE=1 SV=2	P25311	34 kDa	3	1	1		1
334		3-ketoacyl-CoA thiolase, mitochondrial OS=Homo sapiens GN=ACAA2 PE=1 SV=2	P42765	42 kDa	1	1	1	1	2
334		Actin-related protein 2/3 complex subunit 5 OS=Homo sapiens GN=ARPC5 PE=1 SV=3	O15511	16 kDa		6
334		E3 ubiquitin-protein ligase RNF181 OS=Homo sapiens GN=RNF181 PE=1 SV=1	Q9P0P0	18 kDa	6
334		Poly(U)-binding-splicing factor PUF60 OS=Homo sapiens GN=PUF60 PE=1 SV=1	Q9UHX1	60 kDa		1	1		4
334		Replication protein A 70 kDa DNA-binding subunit OS=Homo sapiens GN=RPA1 PE=1 SV=2	P27694	68 kDa	1	2	3
334		Heterogeneous nuclear ribonucleoprotein F OS=Homo sapiens GN=HNRNPF PE=1 SV=3	P52597	46 kDa	1	2	1	2
334		Alpha-2-macroglobulin OS=Homo sapiens GN=A2M PE=1 SV=3	P01023	163 kDa	5	1
334		Ribonuclease H2 subunit C OS=Homo sapiens GN=RNASEH2C PE=1 SV=1	Q8TDP1	18 kDa	6
334		Centromere protein M OS=Homo sapiens GN=CENPM PE=1 SV=1	Q9NSP4	20 kDa	4	1	1
334		Diablo homolog, mitochondrial OS=Homo sapiens GN=DIABLO PE=1 SV=1	Q9NR28	27 kDa	6
334		Synapse-associated protein 1 OS=Homo sapiens GN=SYAP1 PE=1 SV=1	Q96A49	40 kDa	1	1	2	2
334		Chromobox protein homolog 1 OS=Homo sapiens GN=CBX1 PE=1 SV=1	P83916	21 kDa	3	1	1		1
334		Mitochondrial import receptor subunit TOM34 OS=Homo sapiens GN=TOMM34 PE=1 SV=2	Q15785	35 kDa		3	3
334		Synaptosomal-associated protein 23 OS=Homo sapiens GN=SNAP23 PE=1 SV=1	O00161	23 kDa	1	2	2	1
334		Carbonyl reductase [NADPH] 1 OS=Homo sapiens GN=CBR1 PE=1 SV=3	P16152	30 kDa	5				1
400		Neuroblast differentiation-associated protein AHNAK OS=Homo sapiens GN=AHNAK PE=1 SV=2	Q09666	629 kDa	3	1	1
400		Q6IV72-DECOY	Q6IV72-DECOY	?	1	1	1	1	1
400		Cluster of Ig gamma-1 chain C region OS=Homo sapiens GN=IGHG1 PE=1 SV=1 (P01857)	P01857 [3]	36 kDa	3		2
400		Laminin subunit alpha-1 OS=Homo sapiens GN=LAMA1 PE=1 SV=2	P25391	337 kDa		3	1		1
400		Complement C3 OS=Homo sapiens GN=C3 PE=1 SV=2	P01024	187 kDa	4				1
400		Cluster of Guanine nucleotide-binding protein G(I)/G(S)/G(T) subunit beta-2 OS=Homo sapiens GN=GNB2 PE=1 SV=3 (P62879)	P62879 [3]	37 kDa	1	1	1		2
400		Guanine nucleotide-binding protein subunit beta-2-like 1 OS=Homo sapiens GN=GNB2L1 PE=1 SV=3	P63244	35 kDa	2		1	1	1
400		Proteasome subunit beta type-1 OS=Homo sapiens GN=PSMB1 PE=1 SV=2	P20618	26 kDa	2	1		1	1
400		NADH dehydrogenase [ubiquinone] 1 beta subcomplex subunit 6 OS=Homo sapiens GN=NDUFB6 PE=1 SV=3	O95139	15 kDa		5
400		Acyl-coenzyme A thioesterase 13 OS=Homo sapiens GN=ACOT13 PE=1 SV=1	Q9NPJ3	15 kDa	1			1	3
400		Prohibitin OS=Homo sapiens GN=PHB PE=1 SV=1	P35232	30 kDa	1	2			2
400		Proteasome subunit alpha type-6 OS=Homo sapiens GN=PSMA6 PE=1 SV=1	P60900	27 kDa	1	1	1	1	1
400		Pigment epithelium-derived factor OS=Homo sapiens GN=SERPINF1 PE=1 SV=4	P36955	46 kDa	1	1	1	1	1
400		RuvB-like 2 OS=Homo sapiens GN=RUVBL2 PE=1 SV=3	Q9Y230	51 kDa	2	2	1
400		Antigen KI-67 OS=Homo sapiens GN=MKI67 PE=1 SV=2	P46013	359 kDa	1	2	1		1
400		Protein CutA OS=Homo sapiens GN=CUTA PE=1 SV=2	O60888	19 kDa			1	3	1
400		Eukaryotic initiation factor 4A-III OS=Homo sapiens GN=EIF4A3 PE=1 SV=4	P38919	47 kDa	2	1	2
400		NADH dehydrogenase [ubiquinone] 1 beta subcomplex subunit 5, mitochondrial OS=Homo sapiens GN=NDUFB5 PE=1 SV=1	O43674	22 kDa		3	2
400		Coiled-coil domain-containing protein 58 OS=Homo sapiens GN=CCDC58 PE=1 SV=1	Q4VC31	17 kDa			3	2
400		Ornithine aminotransferase, mitochondrial OS=Homo sapiens GN=OAT PE=1 SV=1	P04181	49 kDa	2	1	1		1
400		Nascent polypeptide-associated complex subunit alpha, muscle-specific form OS=Homo sapiens GN=NACA PE=1 SV=1	E9PAV3	205 kDa		2	1		2
400		ATP synthase subunit delta, mitochondrial OS=Homo sapiens GN=ATP5D PE=1 SV=2	P30049	17 kDa	1	1		1	2
400		Sideroflexin-1 OS=Homo sapiens GN=SFXN1 PE=1 SV=4	Q9H9B4	36 kDa	1	1	2		1
400		Trafficking protein particle complex subunit 1 OS=Homo sapiens GN=TRAPPC1 PE=1 SV=1	Q9Y5R8	17 kDa					5
400		Eukaryotic translation elongation factor 1 epsilon-1 OS=Homo sapiens GN=EEF1E1 PE=1 SV=1	O43324	20 kDa	5
400		Protein-glutamine gamma-glutamyltransferase E OS=Homo sapiens GN=TGM3 PE=1 SV=4	Q08188	77 kDa	5
400		Coatomer subunit zeta-1 OS=Homo sapiens GN=COPZ1 PE=1 SV=1	P61923	20 kDa	2	3
400		Chloride intracellular channel protein 1 OS=Homo sapiens GN=CLIC1 PE=1 SV=4	O00299	27 kDa	2	1	1		1
400		10 kDa heat shock protein, mitochondrial OS=Homo sapiens GN=HSPE1 PE=1 SV=2	P61604	11 kDa	2		1	1	1
400		Cluster of Heterogeneous nuclear ribonucleoprotein H OS=Homo sapiens GN=HNRNPH1 PE=1 SV=4 (P31943)	P31943 [2]	49 kDa	1	2	1		1
400		Cluster of Ras-related protein Rab-5C OS=Homo sapiens GN=RAB5C PE=1 SV=2 (P51148)	P51148 [2]	23 kDa	2	2	1
400		NADH dehydrogenase [ubiquinone] 1 alpha subcomplex subunit 8 OS=Homo sapiens GN=NDUFA8 PE=1 SV=3	P51970	20 kDa	4	1
400		Heterogeneous nuclear ribonucleoprotein A3 OS=Homo sapiens GN=HNRNPA3 PE=1 SV=2	P51991	40 kDa	4	1
400		Transmembrane protein 263 OS=Homo sapiens GN=TMEM263 PE=1 SV=1	Q8WUH6	12 kDa	1			3	1
400		Cluster of Insulin-like growth factor 2 mRNA-binding protein 1 OS=Homo sapiens GN=IGF2BP1 PE=1 SV=2 (Q9NZI8)	Q9NZI8	63 kDa	3			1	1
400		Transcription factor BTF3 OS=Homo sapiens GN=BTF3 PE=1 SV=1	P20290	22 kDa	4	1
400		Acidic leucine-rich nuclear phosphoprotein 32 family member B OS=Homo sapiens GN=ANP32B PE=1 SV=1	Q92688	29 kDa	4	1
400		Ubiquinol-cytochrome-c reductase complex assembly factor 2 OS=Homo sapiens GN=UQCC2 PE=1 SV=1	Q9BRT2	15 kDa					5
400		Cation transport regulator-like protein 2 OS=Homo sapiens GN=CHAC2 PE=2 SV=1	Q8WUX2	21 kDa	3	2
400		Transcription factor BTF3 homolog 4 OS=Homo sapiens GN=BTF3L4 PE=1 SV=1	Q96K17	17 kDa	3	2
400		FUN14 domain-containing protein 2 OS=Homo sapiens GN=FUNDC2 PE=1 SV=2	Q9BWH2	21 kDa					5
400		NADH dehydrogenase [ubiquinone] iron-sulfur protein 8, mitochondrial OS=Homo sapiens GN=NDUFS8 PE=1 SV=1	O00217	24 kDa	5
400		Active regulator of SIRT1 OS=Homo sapiens GN=RPS19BP1 PE=1 SV=1	Q86WX3	15 kDa		1	3		1
400		RNA-binding protein 8A OS=Homo sapiens GN=RBM8A PE=1 SV=1	Q9Y5S9	20 kDa	3	1	1
400		U2 small nuclear ribonucleoprotein B'' OS=Homo sapiens GN=SNRPB2 PE=1 SV=1	P08579	25 kDa			2	1	2
400		Insulin receptor substrate 4 OS=Homo sapiens GN=IRS4 PE=1 SV=1	O14654	134 kDa	2		1		2
400		Cluster of High mobility group protein B1 OS=Homo sapiens GN=HMGB1 PE=1 SV=3 (P09429)	P09429 [2]	25 kDa	5
400		Eukaryotic translation initiation factor 4H OS=Homo sapiens GN=EIF4H PE=1 SV=5	Q15056	27 kDa	2	2			1
400		Thioredoxin-like protein 1 OS=Homo sapiens GN=TXNL1 PE=1 SV=3	O43396	32 kDa	2	2			1
400		Trafficking protein particle complex subunit 6A OS=Homo sapiens GN=TRAPPC6A PE=1 SV=2	O75865	18 kDa	1	1	1	2
400		Integrin alpha-5 OS=Homo sapiens GN=ITGA5 PE=1 SV=2	P08648	115 kDa	1	4
400		Parathymosin OS=Homo sapiens GN=PTMS PE=1 SV=2	P20962	12 kDa		3		1	1
400		Bis(5'-nucleosyl)-tetraphosphatase [asymmetrical] OS=Homo sapiens GN=NUDT2 PE=1 SV=3	P50583	17 kDa	2	3
400		Transmembrane protein 70, mitochondrial OS=Homo sapiens GN=TMEM70 PE=1 SV=2	Q9BUB7	29 kDa	3	2
400		Valine--tRNA ligase OS=Homo sapiens GN=VARS PE=1 SV=4	P26640	140 kDa	1	3	1
400		Transmembrane protein 97 OS=Homo sapiens GN=TMEM97 PE=1 SV=1	Q5BJF2	21 kDa	2	3
400		Protein jagunal homolog 1 OS=Homo sapiens GN=JAGN1 PE=1 SV=1	Q8N5M9	21 kDa	4	1
400		Acidic leucine-rich nuclear phosphoprotein 32 family member A OS=Homo sapiens GN=ANP32A PE=1 SV=1	P39687	29 kDa	3		1		1
400		Peptidyl-prolyl cis-trans isomerase NIMA-interacting 4 OS=Homo sapiens GN=PIN4 PE=1 SV=1	Q9Y237	14 kDa	1	1	1		2
400		Acyl-CoA-binding domain-containing protein 5 OS=Homo sapiens GN=ACBD5 PE=1 SV=1	Q5T8D3	60 kDa	1	2	1		1
400		Iron-sulfur cluster assembly 1 homolog, mitochondrial OS=Homo sapiens GN=ISCA1 PE=2 SV=1	Q9BUE6	14 kDa				1	4
400		ADP-ribosylation factor-like protein 2-binding protein OS=Homo sapiens GN=ARL2BP PE=1 SV=1	Q9Y2Y0	19 kDa	4	1
400		Bis(5'-adenosyl)-triphosphatase OS=Homo sapiens GN=FHIT PE=1 SV=3	P49789	17 kDa		2	3
400		N(4)-(beta-N-acetylglucosaminyl)-L-asparaginase OS=Homo sapiens GN=AGA PE=1 SV=2	P20933	37 kDa	1	3	1
400		Flap endonuclease 1 OS=Homo sapiens GN=FEN1 PE=1 SV=1	P39748	43 kDa	2	1	1		1
400		NADH dehydrogenase [ubiquinone] 1 beta subcomplex subunit 11, mitochondrial OS=Homo sapiens GN=NDUFB11 PE=1 SV=1	Q9NX14	17 kDa	3	1	1
400		Inosine-5'-monophosphate dehydrogenase 2 OS=Homo sapiens GN=IMPDH2 PE=1 SV=2	P12268	56 kDa	4	1
400		dCTP pyrophosphatase 1 OS=Homo sapiens GN=DCTPP1 PE=1 SV=1	Q9H773	19 kDa	5
400		Ig kappa chain C region OS=Homo sapiens GN=IGKC PE=1 SV=1	P01834	12 kDa	3	1	1
400		Ubiquitin carboxyl-terminal hydrolase 5 OS=Homo sapiens GN=USP5 PE=1 SV=2	P45974	96 kDa	1	1		1	2
400		SPATS2-like protein OS=Homo sapiens GN=SPATS2L PE=1 SV=2	Q9NUQ6	62 kDa	1	2		1	1
400		Mitochondrial fission process protein 1 OS=Homo sapiens GN=MTFP1 PE=1 SV=1	Q9UDX5	18 kDa	5
400		Protein DEK OS=Homo sapiens GN=DEK PE=1 SV=1	P35659	43 kDa	3	1	1
400		Keratin, type I cytoskeletal 24 OS=Homo sapiens GN=KRT24 PE=1 SV=1	Q2M2I5	55 kDa	3				2
400		Neurofilament heavy polypeptide OS=Homo sapiens GN=NEFH PE=1 SV=4	P12036	112 kDa	3		2
400		Cluster of Transcription factor MafG OS=Homo sapiens GN=MAFG PE=1 SV=1 (O15525)	O15525	18 kDa	4	1
400		Zinc finger HIT domain-containing protein 1 OS=Homo sapiens GN=ZNHIT1 PE=1 SV=1	O43257	18 kDa	5
400		Serpin B12 OS=Homo sapiens GN=SERPINB12 PE=1 SV=1	Q96P63	46 kDa	5
400		Protein FAM210A OS=Homo sapiens GN=FAM210A PE=1 SV=2	Q96ND0	31 kDa	5
400		Probable ATP-dependent RNA helicase DDX17 OS=Homo sapiens GN=DDX17 PE=1 SV=2	Q92841	80 kDa	2	1	1		1
400		Heterogeneous nuclear ribonucleoprotein D-like OS=Homo sapiens GN=HNRNPDL PE=1 SV=3	O14979	46 kDa	2	2	1
400		Cluster of Calponin-3 OS=Homo sapiens GN=CNN3 PE=1 SV=1 (Q15417)	Q15417	36 kDa	3	1	1
400		Transmembrane and coiled-coil domain-containing protein 1 OS=Homo sapiens GN=TMCO1 PE=1 SV=1	Q9UM00	21 kDa	5
400		Microtubule-associated protein 1B OS=Homo sapiens GN=MAP1B PE=1 SV=2	P46821	271 kDa	2		2		1
400		Histone H3-like centromeric protein A OS=Homo sapiens GN=CENPA PE=1 SV=1	P49450	16 kDa		5
400		Vesicle-associated membrane protein-associated protein B/C OS=Homo sapiens GN=VAPB PE=1 SV=3	O95292	27 kDa	1	2	1		1
400		Protein POF1B OS=Homo sapiens GN=POF1B PE=1 SV=3	Q8WVV4	68 kDa	3	1	1
400		Calcium-regulated heat stable protein 1 OS=Homo sapiens GN=CARHSP1 PE=1 SV=2	Q9Y2V2	16 kDa	3	2
492		Cluster of Keratin, type II cuticular Hb5 OS=Homo sapiens GN=KRT85 PE=1 SV=1 (P78386)	P78386 [6]	56 kDa	3		1
492		Cluster of Serine/arginine-rich splicing factor 2 OS=Homo sapiens GN=SRSF2 PE=1 SV=4 (Q01130)	Q01130 [2]	25 kDa	2	1	1
492		Serine/arginine-rich splicing factor 7 OS=Homo sapiens GN=SRSF7 PE=1 SV=1	Q16629	27 kDa	1	1	1		1
492		T-complex protein 1 subunit beta OS=Homo sapiens GN=CCT2 PE=1 SV=4	P78371	57 kDa	2		1		1
492		Thioredoxin-dependent peroxide reductase, mitochondrial OS=Homo sapiens GN=PRDX3 PE=1 SV=3	P30048	28 kDa		2	1		1
492		DNA-dependent protein kinase catalytic subunit OS=Homo sapiens GN=PRKDC PE=1 SV=3	P78527	469 kDa	3		1
492		C-1-tetrahydrofolate synthase, cytoplasmic OS=Homo sapiens GN=MTHFD1 PE=1 SV=3	P11586	102 kDa	2			1	1
492		Cluster of Interleukin enhancer-binding factor 3 OS=Homo sapiens GN=ILF3 PE=1 SV=3 (Q12906)	Q12906	95 kDa	2	2
492		Spectrin alpha chain, non-erythrocytic 1 OS=Homo sapiens GN=SPTAN1 PE=1 SV=3	Q13813	285 kDa	1	2			1
492		Keratin, type II cuticular Hb4 OS=Homo sapiens GN=KRT84 PE=2 SV=2	Q9NSB2	65 kDa	3			1
492		Non-histone chromosomal protein HMG-14 OS=Homo sapiens GN=HMGN1 PE=1 SV=3	P05114	11 kDa	1	2			1
492		Alcohol dehydrogenase 4 OS=Homo sapiens GN=ADH4 PE=1 SV=5	P08319	40 kDa		1	1	1	1
492		NADH dehydrogenase [ubiquinone] 1 alpha subcomplex subunit 12 OS=Homo sapiens GN=NDUFA12 PE=1 SV=1	Q9UI09	17 kDa			3	1
492		Cold-inducible RNA-binding protein OS=Homo sapiens GN=CIRBP PE=1 SV=1	Q14011	19 kDa	3	1
492		Cluster of Serine/arginine-rich splicing factor 10 OS=Homo sapiens GN=SRSF10 PE=1 SV=1 (O75494)	O75494 [2]	31 kDa	2	2
492		U6 snRNA-associated Sm-like protein LSm4 OS=Homo sapiens GN=LSM4 PE=1 SV=1	Q9Y4Z0	15 kDa					4
492		rRNA 2'-O-methyltransferase fibrillarin OS=Homo sapiens GN=FBL PE=1 SV=2	P22087	34 kDa		1	2		1
492		Collagen alpha-2(I) chain OS=Homo sapiens GN=COL1A2 PE=1 SV=7	P08123	129 kDa	1		2	1
492		Cluster of Proteasome subunit alpha type-7 OS=Homo sapiens GN=PSMA7 PE=1 SV=1 (O14818)	O14818	28 kDa	1		1	2
492		Heat shock 70 kDa protein 4 OS=Homo sapiens GN=HSPA4 PE=1 SV=4	P34932	94 kDa	1	1			2
492		Synaptojanin-2-binding protein OS=Homo sapiens GN=SYNJ2BP PE=1 SV=2	P57105	16 kDa			1	2	1
492		Obg-like ATPase 1 OS=Homo sapiens GN=OLA1 PE=1 SV=2	Q9NTK5	45 kDa					4
492		Apoptosis-inducing factor 1, mitochondrial OS=Homo sapiens GN=AIFM1 PE=1 SV=1	O95831	67 kDa	1		1		2
492		Annexin A6 OS=Homo sapiens GN=ANXA6 PE=1 SV=3	P08133	76 kDa	1	1	1		1
492		DNA polymerase epsilon subunit 3 OS=Homo sapiens GN=POLE3 PE=1 SV=1	Q9NRF9	17 kDa		4
492		Mediator of RNA polymerase II transcription subunit 22 OS=Homo sapiens GN=MED22 PE=1 SV=2	Q15528	22 kDa			3	1
492		Mitochondrial fission 1 protein OS=Homo sapiens GN=FIS1 PE=1 SV=2	Q9Y3D6	17 kDa			1	2	1
492		Cathepsin D OS=Homo sapiens GN=CTSD PE=1 SV=1	P07339	45 kDa	2				2
492		DNA-directed RNA polymerases I and III subunit RPAC2 OS=Homo sapiens GN=POLR1D PE=1 SV=1	Q9Y2S0	15 kDa				1	3
492		Synaptogyrin-2 OS=Homo sapiens GN=SYNGR2 PE=1 SV=1	O43760	25 kDa	2	2
492		Putative bifunctional UDP-N-acetylglucosamine transferase and deubiquitinase ALG13 OS=Homo sapiens GN=ALG13 PE=1 SV=2	Q9NP73	126 kDa	3	1
492		Probable ATP-dependent RNA helicase DDX5 OS=Homo sapiens GN=DDX5 PE=1 SV=1	P17844	69 kDa	2	1			1
492		Methylosome subunit pICln OS=Homo sapiens GN=CLNS1A PE=1 SV=1	P54105	26 kDa	1	2	1
492		Vacuolar protein-sorting-associated protein 25 OS=Homo sapiens GN=VPS25 PE=1 SV=1	Q9BRG1	21 kDa	4
492		Ribonuclease P protein subunit p25-like protein OS=Homo sapiens GN=RPP25L PE=1 SV=1	Q8N5L8	18 kDa	4
492		Ubiquitin thioesterase OTUB1 OS=Homo sapiens GN=OTUB1 PE=1 SV=2	Q96FW1	31 kDa	1		2		1
492		Astrocytic phosphoprotein PEA-15 OS=Homo sapiens GN=PEA15 PE=1 SV=2	Q15121	15 kDa		1			3
492		Multifunctional protein ADE2 OS=Homo sapiens GN=PAICS PE=1 SV=3	P22234	47 kDa			1		3
492		Transmembrane emp24 domain-containing protein 10 OS=Homo sapiens GN=TMED10 PE=1 SV=2	P49755	25 kDa	4
492		TAR DNA-binding protein 43 OS=Homo sapiens GN=TARDBP PE=1 SV=1	Q13148	45 kDa	3		1
492		UPF0687 protein C20orf27 OS=Homo sapiens GN=C20orf27 PE=1 SV=3	Q9GZN8	19 kDa	4
492		Serine/threonine-protein phosphatase PGAM5, mitochondrial OS=Homo sapiens GN=PGAM5 PE=1 SV=2	Q96HS1	32 kDa	2	1	1
492		Heat shock protein 75 kDa, mitochondrial OS=Homo sapiens GN=TRAP1 PE=1 SV=3	Q12931	80 kDa	1		1	1	1
492		Rab GDP dissociation inhibitor alpha OS=Homo sapiens GN=GDI1 PE=1 SV=2	P31150	51 kDa	1	2	1
492		Ubiquitin-conjugating enzyme E2 C OS=Homo sapiens GN=UBE2C PE=1 SV=1	O00762	20 kDa	4
492		Glutamyl-tRNA(Gln) amidotransferase subunit C, mitochondrial OS=Homo sapiens GN=GATC PE=2 SV=1	O43716	15 kDa					4
492		Gamma-aminobutyric acid receptor-associated protein-like 2 OS=Homo sapiens GN=GABARAPL2 PE=1 SV=1	P60520	14 kDa					4
492		ER membrane protein complex subunit 4 OS=Homo sapiens GN=EMC4 PE=1 SV=2	Q5J8M3	20 kDa	4
492		PRA1 family protein 2 OS=Homo sapiens GN=PRAF2 PE=1 SV=1	O60831	19 kDa	3	1
492		T-complex protein 1 subunit eta OS=Homo sapiens GN=CCT7 PE=1 SV=2	Q99832	59 kDa		2	1		1
492		Eukaryotic translation initiation factor 2 subunit 2 OS=Homo sapiens GN=EIF2S2 PE=1 SV=2	P20042	38 kDa	3	1
492		Protein disulfide-isomerase A6 OS=Homo sapiens GN=PDIA6 PE=1 SV=1	Q15084	48 kDa	2				2
492		Trifunctional enzyme subunit beta, mitochondrial OS=Homo sapiens GN=HADHB PE=1 SV=3	P55084	51 kDa	2	1	1
492		3-hydroxyacyl-CoA dehydrogenase type-2 OS=Homo sapiens GN=HSD17B10 PE=1 SV=3	Q99714	27 kDa	1		2		1
492		Phosphatidylinositol N-acetylglucosaminyltransferase subunit H OS=Homo sapiens GN=PIGH PE=1 SV=1	Q14442	21 kDa	4
492		Histidine triad nucleotide-binding protein 2, mitochondrial OS=Homo sapiens GN=HINT2 PE=1 SV=1	Q9BX68	17 kDa				2	2
492		Prostaglandin-H2 D-isomerase OS=Homo sapiens GN=PTGDS PE=1 SV=1	P41222	21 kDa		1		1	2
492		Glucose-6-phosphate isomerase OS=Homo sapiens GN=GPI PE=1 SV=4	P06744	63 kDa		2	1		1
492		EKC/KEOPS complex subunit LAGE3 OS=Homo sapiens GN=LAGE3 PE=1 SV=2	Q14657	15 kDa	2	2
492		Cluster of ADP-ribosylation factor-like protein 5B OS=Homo sapiens GN=ARL5B PE=1 SV=1 (Q96KC2)	Q96KC2 [2]	20 kDa	4
492		Calcineurin subunit B type 1 OS=Homo sapiens GN=PPP3R1 PE=1 SV=2	P63098	19 kDa		1	2	1
492		Diphosphoinositol polyphosphate phosphohydrolase 1 OS=Homo sapiens GN=NUDT3 PE=1 SV=1	O95989	19 kDa	2	2
492		Eukaryotic translation initiation factor 3 subunit F OS=Homo sapiens GN=EIF3F PE=1 SV=1	O00303	38 kDa		3	1
492		Protein phosphatase 1G OS=Homo sapiens GN=PPM1G PE=1 SV=1	O15355	59 kDa	2			1	1
492		Eukaryotic translation initiation factor 4E-binding protein 1 OS=Homo sapiens GN=EIF4EBP1 PE=1 SV=3	Q13541	13 kDa		2	2
492		Isocitrate dehydrogenase [NADP] cytoplasmic OS=Homo sapiens GN=IDH1 PE=1 SV=2	O75874	47 kDa	1	2	1
492		Hippocalcin-like protein 1 OS=Homo sapiens GN=HPCAL1 PE=1 SV=3	P37235	22 kDa	4
492		Prohibitin-2 OS=Homo sapiens GN=PHB2 PE=1 SV=2	Q99623	33 kDa	4
492		Tubulin-folding cofactor B OS=Homo sapiens GN=TBCB PE=1 SV=2	Q99426	27 kDa	1	1	1		1
492		Lysosomal protective protein OS=Homo sapiens GN=CTSA PE=1 SV=2	P10619	54 kDa	3	1
492		Cystatin-A OS=Homo sapiens GN=CSTA PE=1 SV=1	P01040	11 kDa	2	1		1
492		Coatomer subunit delta OS=Homo sapiens GN=ARCN1 PE=1 SV=1	P48444	57 kDa	2	2
492		Transmembrane protein 223 OS=Homo sapiens GN=TMEM223 PE=1 SV=1	A0PJW6	22 kDa	4
492		Ankyrin repeat domain-containing protein 39 OS=Homo sapiens GN=ANKRD39 PE=1 SV=1	Q53RE8	20 kDa	4
492		Oligosaccharyltransferase complex subunit OSTC OS=Homo sapiens GN=OSTC PE=1 SV=1	Q9NRP0	17 kDa		1	2	1
492		GSK3-beta interaction protein OS=Homo sapiens GN=GSKIP PE=1 SV=2	Q9P0R6	16 kDa		2	2
492		Drebrin-like protein OS=Homo sapiens GN=DBNL PE=1 SV=1	Q9UJU6	48 kDa		2			2
492		U6 snRNA-associated Sm-like protein LSm3 OS=Homo sapiens GN=LSM3 PE=1 SV=2	P62310	12 kDa		1	1	2
492		Ribosome-binding protein 1 OS=Homo sapiens GN=RRBP1 PE=1 SV=4	Q9P2E9	152 kDa	1	1			2
492		D-dopachrome decarboxylase-like protein OS=Homo sapiens GN=DDTL PE=2 SV=1	A6NHG4 (+1)	14 kDa	1		1	1	1
492		Thioredoxin-like protein 4B OS=Homo sapiens GN=TXNL4B PE=1 SV=1	Q9NX01	17 kDa				3	1
492		WW domain-binding protein 2 OS=Homo sapiens GN=WBP2 PE=1 SV=1	Q969T9	28 kDa	1	1	1		1
492		Golgin subfamily A member 7 OS=Homo sapiens GN=GOLGA7 PE=1 SV=2	Q7Z5G4	16 kDa					4
492		Membrane-associated progesterone receptor component 2 OS=Homo sapiens GN=PGRMC2 PE=1 SV=1	O15173	24 kDa	3	1
492		Pre-mRNA-processing factor 19 OS=Homo sapiens GN=PRPF19 PE=1 SV=1	Q9UMS4	55 kDa	1	1			2
492		Ubiquitin-like protein ISG15 OS=Homo sapiens GN=ISG15 PE=1 SV=5	P05161	18 kDa					4
492		4-trimethylaminobutyraldehyde dehydrogenase OS=Homo sapiens GN=ALDH9A1 PE=1 SV=3	P49189	54 kDa	2				2
492		Host cell factor 1 OS=Homo sapiens GN=HCFC1 PE=1 SV=2	P51610	209 kDa	2	1			1
492		DNA damage-binding protein 1 OS=Homo sapiens GN=DDB1 PE=1 SV=1	Q16531	127 kDa	3	1
492		Cluster of Serpin B3 OS=Homo sapiens GN=SERPINB3 PE=1 SV=2 (P29508)	P29508 [2]	45 kDa	4
492		Peptidyl-tRNA hydrolase ICT1, mitochondrial OS=Homo sapiens GN=ICT1 PE=1 SV=1	Q14197	24 kDa	4
492		OCIA domain-containing protein 2 OS=Homo sapiens GN=OCIAD2 PE=1 SV=1	Q56VL3	17 kDa			4
492		Keratin, type I cytoskeletal 23 OS=Homo sapiens GN=KRT23 PE=1 SV=2	Q9C075	48 kDa	4
492		Protein UXT OS=Homo sapiens GN=UXT PE=1 SV=1	Q9UBK9	18 kDa	2	2
492		S-adenosylmethionine synthase isoform type-2 OS=Homo sapiens GN=MAT2A PE=1 SV=1	P31153	44 kDa	2	1	1
492		ADP-ribosylation factor GTPase-activating protein 1 OS=Homo sapiens GN=ARFGAP1 PE=1 SV=2	Q8N6T3	45 kDa	2		1		1
492		Nuclease-sensitive element-binding protein 1 OS=Homo sapiens GN=YBX1 PE=1 SV=3	P67809	36 kDa	4
492		Calmodulin-like protein 3 OS=Homo sapiens GN=CALML3 PE=1 SV=2	P27482	17 kDa	2		2
492		N-acetyltransferase 14 OS=Homo sapiens GN=NAT14 PE=1 SV=1	Q8WUY8	22 kDa	4
492		RNA-binding protein NOB1 OS=Homo sapiens GN=NOB1 PE=1 SV=1	Q9ULX3	47 kDa	3	1
492		Transcriptional repressor protein YY1 OS=Homo sapiens GN=YY1 PE=1 SV=2	P25490	45 kDa	1	3
492		Cell adhesion molecule 1 OS=Homo sapiens GN=CADM1 PE=1 SV=2	Q9BY67	49 kDa		1	2		1
492		Protein FAM192A OS=Homo sapiens GN=FAM192A PE=1 SV=1	Q9GZU8	29 kDa	3		1
492		Asparagine--tRNA ligase, cytoplasmic OS=Homo sapiens GN=NARS PE=1 SV=1	O43776	63 kDa	2	2
492		Histone chaperone ASF1A OS=Homo sapiens GN=ASF1A PE=1 SV=1	Q9Y294	23 kDa	2	2
492		Putative ribonuclease OS=Homo sapiens GN=YBEY PE=1 SV=2	P58557	19 kDa	2	2
492		Cysteine and glycine-rich protein 1 OS=Homo sapiens GN=CSRP1 PE=1 SV=3	P21291	21 kDa	4
492		Phospholipase D3 OS=Homo sapiens GN=PLD3 PE=1 SV=1	Q8IV08	55 kDa	2	1			1
492		Immunoglobulin lambda-like polypeptide 5 OS=Homo sapiens GN=IGLL5 PE=2 SV=2	B9A064	23 kDa	3		1
609		Prothymosin alpha OS=Homo sapiens GN=PTMA PE=1 SV=2	P06454	12 kDa		1	2
609		Cluster of Glutamate dehydrogenase 1, mitochondrial OS=Homo sapiens GN=GLUD1 PE=1 SV=2 (P00367)	P00367 [2]	61 kDa	1		1		1
609		Spectrin beta chain, non-erythrocytic 2 OS=Homo sapiens GN=SPTBN2 PE=1 SV=3	O15020	271 kDa	2	1
609		Threonine--tRNA ligase, cytoplasmic OS=Homo sapiens GN=TARS PE=1 SV=3	P26639	83 kDa		1	2
609		Eukaryotic translation initiation factor 2 subunit 3 OS=Homo sapiens GN=EIF2S3 PE=1 SV=3	P41091	51 kDa	1				2
609		Apolipoprotein A-I OS=Homo sapiens GN=APOA1 PE=1 SV=1	P02647	31 kDa			2		1
609		Dolichyl-diphosphooligosaccharide--protein glycosyltransferase subunit 1 OS=Homo sapiens GN=RPN1 PE=1 SV=1	P04843	69 kDa		1	1		1
609		Elongation factor Tu, mitochondrial OS=Homo sapiens GN=TUFM PE=1 SV=2	P49411	50 kDa			1		2
609		High mobility group protein HMG-I/HMG-Y OS=Homo sapiens GN=HMGA1 PE=1 SV=3	P17096	12 kDa		2	1
609		Profilin-2 OS=Homo sapiens GN=PFN2 PE=1 SV=3	P35080	15 kDa	1		1		1
609		Deoxycytidylate deaminase OS=Homo sapiens GN=DCTD PE=1 SV=2	P32321	20 kDa	3
609		Proteasome subunit beta type-6 OS=Homo sapiens GN=PSMB6 PE=1 SV=4	P28072	25 kDa	2	1
609		Trafficking protein particle complex subunit 6B OS=Homo sapiens GN=TRAPPC6B PE=1 SV=1	Q86SZ2	18 kDa			2	1
609		DNA-directed RNA polymerase II subunit RPB4 OS=Homo sapiens GN=POLR2D PE=1 SV=1	O15514	16 kDa		3
609		Collagen alpha-3(VI) chain OS=Homo sapiens GN=COL6A3 PE=1 SV=5	P12111	344 kDa	1		2
609		Cytosolic acyl coenzyme A thioester hydrolase OS=Homo sapiens GN=ACOT7 PE=1 SV=3	O00154	42 kDa	2	1
609		Protein FAM136A OS=Homo sapiens GN=FAM136A PE=1 SV=1	Q96C01	16 kDa					3
609		ATP-citrate synthase OS=Homo sapiens GN=ACLY PE=1 SV=3	P53396	121 kDa	1	1	1
609		26S protease regulatory subunit 7 OS=Homo sapiens GN=PSMC2 PE=1 SV=3	P35998	49 kDa		3
609		Serine/arginine-rich splicing factor 3 OS=Homo sapiens GN=SRSF3 PE=1 SV=1	P84103	19 kDa		2		1
609		Tyrosine-protein phosphatase non-receptor type 11 OS=Homo sapiens GN=PTPN11 PE=1 SV=2	Q06124	68 kDa	1		2
609		SNARE-associated protein Snapin OS=Homo sapiens GN=SNAPIN PE=1 SV=1	O95295	15 kDa				3
609		Putative RNA-binding protein 3 OS=Homo sapiens GN=RBM3 PE=1 SV=1	P98179	17 kDa		1	2
609		Plasminogen activator inhibitor 1 RNA-binding protein OS=Homo sapiens GN=SERBP1 PE=1 SV=2	Q8NC51	45 kDa	1	2
609		Filaggrin OS=Homo sapiens GN=FLG PE=1 SV=3	P20930	435 kDa	3
609		Cytochrome b-c1 complex subunit 1, mitochondrial OS=Homo sapiens GN=UQCRC1 PE=1 SV=3	P31930	53 kDa	1	2
609		Activator of 90 kDa heat shock protein ATPase homolog 1 OS=Homo sapiens GN=AHSA1 PE=1 SV=1	O95433	38 kDa	2	1
609		N-alpha-acetyltransferase 20 OS=Homo sapiens GN=NAA20 PE=1 SV=1	P61599	20 kDa	3
609		Apolipoprotein O OS=Homo sapiens GN=APOO PE=1 SV=1	Q9BUR5	22 kDa	1		1	1
609		Transcription factor A, mitochondrial OS=Homo sapiens GN=TFAM PE=1 SV=1	Q00059	29 kDa	3
609		DNA replication licensing factor MCM6 OS=Homo sapiens GN=MCM6 PE=1 SV=1	Q14566	93 kDa		3
609		Calcyclin-binding protein OS=Homo sapiens GN=CACYBP PE=1 SV=2	Q9HB71	26 kDa	3
609		Heat shock protein beta-1 OS=Homo sapiens GN=HSPB1 PE=1 SV=2	P04792	23 kDa	2	1
609		Fructose-bisphosphate aldolase B OS=Homo sapiens GN=ALDOB PE=1 SV=2	P05062	39 kDa	1	1	1
609		Ras-related protein Rab-7a OS=Homo sapiens GN=RAB7A PE=1 SV=1	P51149	23 kDa	1	1			1
609		S-formylglutathione hydrolase OS=Homo sapiens GN=ESD PE=1 SV=2	P10768	31 kDa	1				2
609		Annexin A7 OS=Homo sapiens GN=ANXA7 PE=1 SV=3	P20073	53 kDa	1	1	1
609		Protein Dr1 OS=Homo sapiens GN=DR1 PE=1 SV=1	Q01658	19 kDa	2	1
609		Cluster of RNA-binding protein FUS OS=Homo sapiens GN=FUS PE=1 SV=1 (P35637)	P35637	53 kDa	3
609		Small nuclear ribonucleoprotein Sm D1 OS=Homo sapiens GN=SNRPD1 PE=1 SV=1	P62314	13 kDa					3
609		Iron-sulfur cluster assembly 2 homolog, mitochondrial OS=Homo sapiens GN=ISCA2 PE=1 SV=2	Q86U28	16 kDa					3
609		Peflin OS=Homo sapiens GN=PEF1 PE=1 SV=1	Q9UBV8	30 kDa		3
609		Platelet-activating factor acetylhydrolase IB subunit gamma OS=Homo sapiens GN=PAFAH1B3 PE=1 SV=1	Q15102	26 kDa	2	1
609		Prolactin-inducible protein OS=Homo sapiens GN=PIP PE=1 SV=1	P12273	17 kDa	1		2
609		Inter-alpha-trypsin inhibitor heavy chain H1 OS=Homo sapiens GN=ITIH1 PE=1 SV=3	P19827	101 kDa	1	1	1
609		Transmembrane protein 65 OS=Homo sapiens GN=TMEM65 PE=1 SV=2	Q6PI78	25 kDa	3
609		NADH dehydrogenase [ubiquinone] iron-sulfur protein 4, mitochondrial OS=Homo sapiens GN=NDUFS4 PE=1 SV=1	O43181	20 kDa	2	1
609		Protein LLP homolog OS=Homo sapiens GN=LLPH PE=2 SV=1	Q9BRT6	15 kDa	2	1
609		Cluster of ADP-ribosylation factor-like protein 8A OS=Homo sapiens GN=ARL8A PE=1 SV=1 (Q96BM9)	Q96BM9 [2]	21 kDa	2	1
609		Golgi-associated plant pathogenesis-related protein 1 OS=Homo sapiens GN=GLIPR2 PE=1 SV=3	Q9H4G4	17 kDa		1	1	1
609		Neutrophil defensin 1 OS=Homo sapiens GN=DEFA1 PE=1 SV=1	P59665	10 kDa		1	2
609		Proteasome subunit alpha type-5 OS=Homo sapiens GN=PSMA5 PE=1 SV=3	P28066	26 kDa			1	2
609		Interleukin enhancer-binding factor 2 OS=Homo sapiens GN=ILF2 PE=1 SV=2	Q12905	43 kDa	1		1		1
609		Proteasome activator complex subunit 2 OS=Homo sapiens GN=PSME2 PE=1 SV=4	Q9UL46	27 kDa	3
609		High mobility group protein HMGI-C OS=Homo sapiens GN=HMGA2 PE=1 SV=1	P52926	12 kDa	2	1
609		Puromycin-sensitive aminopeptidase OS=Homo sapiens GN=NPEPPS PE=1 SV=2	P55786	103 kDa	3
609		RNA-binding protein 12 OS=Homo sapiens GN=RBM12 PE=1 SV=1	Q9NTZ6	97 kDa	1	2
609		Leukotriene A-4 hydrolase OS=Homo sapiens GN=LTA4H PE=1 SV=2	P09960	69 kDa	2	1
609		Phosphatidylinositol transfer protein beta isoform OS=Homo sapiens GN=PITPNB PE=1 SV=2	P48739	32 kDa	2	1
609		Selenoprotein H OS=Homo sapiens GN=SELH PE=1 SV=2	Q8IZQ5	13 kDa					3
609		Multifunctional methyltransferase subunit TRM112-like protein OS=Homo sapiens GN=TRMT112 PE=1 SV=1	Q9UI30	14 kDa			1		2
609		p53 and DNA damage-regulated protein 1 OS=Homo sapiens GN=PDRG1 PE=1 SV=2	Q9NUG6	16 kDa					3
609		Transformer-2 protein homolog alpha OS=Homo sapiens GN=TRA2A PE=1 SV=1	Q13595	33 kDa	3
609		Protein FAM162A OS=Homo sapiens GN=FAM162A PE=1 SV=2	Q96A26	17 kDa			1	1	1
609		26S proteasome non-ATPase regulatory subunit 3 OS=Homo sapiens GN=PSMD3 PE=1 SV=2	O43242	61 kDa	1				2
609		Isoaspartyl peptidase/L-asparaginase OS=Homo sapiens GN=ASRGL1 PE=1 SV=2	Q7L266	32 kDa				2	1
609		Histidine triad nucleotide-binding protein 1 OS=Homo sapiens GN=HINT1 PE=1 SV=2	P49773	14 kDa					3
609		ATP-dependent RNA helicase DDX18 OS=Homo sapiens GN=DDX18 PE=1 SV=2	Q9NVP1	75 kDa	2	1
609		Eukaryotic translation initiation factor 5 OS=Homo sapiens GN=EIF5 PE=1 SV=2	P55010	49 kDa	2	1
609		Cornifin-A OS=Homo sapiens GN=SPRR1A PE=1 SV=2	P35321	10 kDa	2		1
609		Ran GTPase-activating protein 1 OS=Homo sapiens GN=RANGAP1 PE=1 SV=1	P46060	64 kDa		2	1
609		Polyadenylate-binding protein 2 OS=Homo sapiens GN=PABPN1 PE=1 SV=3	Q86U42	33 kDa	1	2
609		Growth factor receptor-bound protein 2 OS=Homo sapiens GN=GRB2 PE=1 SV=1	P62993	25 kDa	3
609		Galectin-7 OS=Homo sapiens GN=LGALS7 PE=1 SV=2	P47929	15 kDa	2		1
609		Retinoid-inducible serine carboxypeptidase OS=Homo sapiens GN=SCPEP1 PE=1 SV=1	Q9HB40	51 kDa		2	1
609		Mitochondrial import inner membrane translocase subunit Tim17-A OS=Homo sapiens GN=TIMM17A PE=1 SV=1	Q99595	18 kDa	1		1		1
609		Cytochrome b5 type B OS=Homo sapiens GN=CYB5B PE=1 SV=2	O43169	16 kDa	1	2
609		Galectin-1 OS=Homo sapiens GN=LGALS1 PE=1 SV=2	P09382	15 kDa		1	2
609		Protein-glutamine gamma-glutamyltransferase K OS=Homo sapiens GN=TGM1 PE=1 SV=4	P22735	90 kDa	3
609		Fas apoptotic inhibitory molecule 1 OS=Homo sapiens GN=FAIM PE=1 SV=1	Q9NVQ4	20 kDa	3
609		Histidine ammonia-lyase OS=Homo sapiens GN=HAL PE=1 SV=1	P42357	73 kDa	3
609		Fibroblast growth factor 2 OS=Homo sapiens GN=FGF2 PE=1 SV=3	P09038	31 kDa		3
609		Chromatin complexes subunit BAP18 OS=Homo sapiens GN=BAP18 PE=1 SV=1	Q8IXM2	18 kDa			2		1
609		Cluster of Microtubule-associated proteins 1A/1B light chain 3A OS=Homo sapiens GN=MAP1LC3A PE=1 SV=2 (Q9H492)	Q9H492	14 kDa		1	2
609		Spindle and kinetochore-associated protein 2 OS=Homo sapiens GN=SKA2 PE=1 SV=1	Q8WVK7	14 kDa					3
609		Tctex1 domain-containing protein 2 OS=Homo sapiens GN=TCTEX1D2 PE=1 SV=2	Q8WW35	16 kDa			3
609		DNA polymerase epsilon subunit 4 OS=Homo sapiens GN=POLE4 PE=1 SV=2	Q9NR33	12 kDa	1	2
609		Mitochondrial import inner membrane translocase subunit Tim23 OS=Homo sapiens GN=TIMM23 PE=1 SV=1	O14925	22 kDa		3
609		Glucosidase 2 subunit beta OS=Homo sapiens GN=PRKCSH PE=1 SV=2	P14314	59 kDa	2	1
609		Transmembrane emp24 domain-containing protein 7 OS=Homo sapiens GN=TMED7 PE=1 SV=2	Q9Y3B3	25 kDa	2		1
609		Myb-binding protein 1A OS=Homo sapiens GN=MYBBP1A PE=1 SV=2	Q9BQG0	149 kDa	2			1
609		DnaJ homolog subfamily A member 2 OS=Homo sapiens GN=DNAJA2 PE=1 SV=1	O60884	46 kDa	2	1
609		Protein S100-A11 OS=Homo sapiens GN=S100A11 PE=1 SV=2	P31949	12 kDa		2	1
609		Dipeptidyl peptidase 1 OS=Homo sapiens GN=CTSC PE=1 SV=2	P53634	52 kDa	3
609		Tubulin polymerization-promoting protein family member 3 OS=Homo sapiens GN=TPPP3 PE=1 SV=1	Q9BW30	19 kDa	2	1
609		Microsomal glutathione S-transferase 3 OS=Homo sapiens GN=MGST3 PE=1 SV=1	O14880	17 kDa			2	1
609		MIP18 family protein FAM96A OS=Homo sapiens GN=FAM96A PE=1 SV=1	Q9H5X1	18 kDa	1	2
609		PRKC apoptosis WT1 regulator protein OS=Homo sapiens GN=PAWR PE=1 SV=1	Q96IZ0	37 kDa				1	2
609		B-cell receptor-associated protein 31 OS=Homo sapiens GN=BCAP31 PE=1 SV=3	P51572	28 kDa	3
609		FLYWCH family member 2 OS=Homo sapiens GN=FLYWCH2 PE=1 SV=1	Q96CP2	15 kDa	2	1
609		NADH dehydrogenase [ubiquinone] 1 beta subcomplex subunit 4 OS=Homo sapiens GN=NDUFB4 PE=1 SV=3	O95168	15 kDa					3
609		Dihydropyrimidinase-related protein 2 OS=Homo sapiens GN=DPYSL2 PE=1 SV=1	Q16555	62 kDa	3
609		Transcription initiation factor TFIID subunit 12 OS=Homo sapiens GN=TAF12 PE=1 SV=1	Q16514	18 kDa	3
609		Nucleoside diphosphate kinase 6 OS=Homo sapiens GN=NME6 PE=1 SV=3	O75414	21 kDa	3
609		Actin-related protein 2/3 complex subunit 5-like protein OS=Homo sapiens GN=ARPC5L PE=1 SV=1	Q9BPX5	17 kDa	2	1
609		RecQ-mediated genome instability protein 2 OS=Homo sapiens GN=RMI2 PE=1 SV=2	Q96E14	16 kDa	3
609		General transcription factor II-I OS=Homo sapiens GN=GTF2I PE=1 SV=2	P78347	112 kDa	2	1
609		Ubiquitin-conjugating enzyme E2 G1 OS=Homo sapiens GN=UBE2G1 PE=1 SV=3	P62253	20 kDa	3
609		High mobility group protein B3 OS=Homo sapiens GN=HMGB3 PE=1 SV=4	O15347	23 kDa	2	1
609		Protein tyrosine phosphatase type IVA 2 OS=Homo sapiens GN=PTP4A2 PE=1 SV=1	Q12974	19 kDa	3
609		Protein tyrosine phosphatase type IVA 1 OS=Homo sapiens GN=PTP4A1 PE=1 SV=2	Q93096	20 kDa	3
609		GTPase HRas OS=Homo sapiens GN=HRAS PE=1 SV=1	P01112	21 kDa	3
609		Inorganic pyrophosphatase 2, mitochondrial OS=Homo sapiens GN=PPA2 PE=1 SV=2	Q9H2U2	38 kDa	2	1
609		Vesicle transport protein SFT2B OS=Homo sapiens GN=SFT2D2 PE=1 SV=1	O95562	18 kDa	1	2
609		Stromal membrane-associated protein 2 OS=Homo sapiens GN=SMAP2 PE=1 SV=1	Q8WU79	47 kDa	3
609		Mitotic spindle-associated MMXD complex subunit MIP18 OS=Homo sapiens GN=FAM96B PE=1 SV=1	Q9Y3D0	18 kDa		3
609		Protein SEC13 homolog OS=Homo sapiens GN=SEC13 PE=1 SV=3	P55735	36 kDa	1	1	1
609		Signal peptidase complex catalytic subunit SEC11C OS=Homo sapiens GN=SEC11C PE=1 SV=3	Q9BY50	22 kDa	2	1
609		Eukaryotic translation initiation factor 3 subunit B OS=Homo sapiens GN=EIF3B PE=1 SV=3	P55884	92 kDa	1		2
609		Histone chaperone ASF1B OS=Homo sapiens GN=ASF1B PE=1 SV=1	Q9NVP2	22 kDa	2	1
609		ATPase family AAA domain-containing protein 2 OS=Homo sapiens GN=ATAD2 PE=1 SV=1	Q6PL18	159 kDa		2	1
609		Cytosol aminopeptidase OS=Homo sapiens GN=LAP3 PE=1 SV=3	P28838	56 kDa	2		1
609		Nucleosome assembly protein 1-like 1 OS=Homo sapiens GN=NAP1L1 PE=1 SV=1	P55209	45 kDa	1		2
609		Tumor protein D54 OS=Homo sapiens GN=TPD52L2 PE=1 SV=2	O43399	22 kDa	3
609		Ras-related protein Rab-13 OS=Homo sapiens GN=RAB13 PE=1 SV=1	P51153	23 kDa	3
609		V-set and immunoglobulin domain-containing protein 8 OS=Homo sapiens GN=VSIG8 PE=1 SV=1	Q5VU13	44 kDa	3
609		Reticulon-2 OS=Homo sapiens GN=RTN2 PE=1 SV=1	O75298	59 kDa	3
609		Double-stranded RNA-binding protein Staufen homolog 1 OS=Homo sapiens GN=STAU1 PE=1 SV=2	O95793	63 kDa					3
609		Cleavage and polyadenylation specificity factor subunit 6 OS=Homo sapiens GN=CPSF6 PE=1 SV=2	Q16630	59 kDa	3
609		Chloride intracellular channel protein 4 OS=Homo sapiens GN=CLIC4 PE=1 SV=4	Q9Y696	29 kDa	1	2
609		Succinate dehydrogenase assembly factor 2, mitochondrial OS=Homo sapiens GN=SDHAF2 PE=1 SV=1	Q9NX18	20 kDa					3
609		Caspase-3 OS=Homo sapiens GN=CASP3 PE=1 SV=2	P42574	32 kDa	1	2
609		Histidine triad nucleotide-binding protein 3 OS=Homo sapiens GN=HINT3 PE=1 SV=1	Q9NQE9	20 kDa	2	1
609		Zinc finger protein 576 OS=Homo sapiens GN=ZNF576 PE=2 SV=1	Q9H609	19 kDa	3
609		Rho guanine nucleotide exchange factor 11 OS=Homo sapiens GN=ARHGEF11 PE=1 SV=1	O15085	168 kDa	2				1
609		Glyceraldehyde-3-phosphate dehydrogenase, testis-specific OS=Homo sapiens GN=GAPDHS PE=1 SV=2	O14556	45 kDa			1		2
609		Deleted in malignant brain tumors 1 protein OS=Homo sapiens GN=DMBT1 PE=1 SV=2	Q9UGM3	261 kDa	3
609		HLA class I histocompatibility antigen, B-58 alpha chain OS=Homo sapiens GN=HLA-B PE=1 SV=1	P10319 (+13)	40 kDa	2		1
757		Titin OS=Homo sapiens GN=TTN PE=1 SV=4	Q8WZ42	3816 kDa	1				1
757		Serine/arginine-rich splicing factor 1 OS=Homo sapiens GN=SRSF1 PE=1 SV=2	Q07955	28 kDa		2
757		Emerin OS=Homo sapiens GN=EMD PE=1 SV=1	P50402	29 kDa			1		1
757		Trifunctional enzyme subunit alpha, mitochondrial OS=Homo sapiens GN=HADHA PE=1 SV=2	P40939	83 kDa	1				1
757		Tyrosine--tRNA ligase, cytoplasmic OS=Homo sapiens GN=YARS PE=1 SV=4	P54577	59 kDa	1	1
757		Electron transfer flavoprotein subunit alpha, mitochondrial OS=Homo sapiens GN=ETFA PE=1 SV=1	P13804	35 kDa		1			1
757		Cluster of Platelet-derived growth factor receptor alpha OS=Homo sapiens GN=PDGFRA PE=1 SV=1 (P16234)	P16234	123 kDa		2
757		Cluster of Polypyrimidine tract-binding protein 1 OS=Homo sapiens GN=PTBP1 PE=1 SV=1 (P26599)	P26599	57 kDa		1	1
757		Cluster of Histone-binding protein RBBP7 OS=Homo sapiens GN=RBBP7 PE=1 SV=1 (Q16576)	Q16576	48 kDa	2
757		Fatty acid-binding protein, liver OS=Homo sapiens GN=FABP1 PE=1 SV=1	P07148	14 kDa			1		1
757		ATP synthase subunit O, mitochondrial OS=Homo sapiens GN=ATP5O PE=1 SV=1	P48047	23 kDa	1		1
757		Liver carboxylesterase 1 OS=Homo sapiens GN=CES1 PE=1 SV=2	P23141	63 kDa			1		1
757		Mitochondrial import inner membrane translocase subunit Tim17-B OS=Homo sapiens GN=TIMM17B PE=1 SV=1	O60830	18 kDa	2
757		L-xylulose reductase OS=Homo sapiens GN=DCXR PE=1 SV=2	Q7Z4W1	26 kDa			1		1
757		Peptidyl-prolyl cis-trans isomerase-like 3 OS=Homo sapiens GN=PPIL3 PE=1 SV=1	Q9H2H8	18 kDa			2
757		NADH dehydrogenase [ubiquinone] 1 subunit C2 OS=Homo sapiens GN=NDUFC2 PE=1 SV=1	O95298	14 kDa					2
757		Synaptic vesicle membrane protein VAT-1 homolog OS=Homo sapiens GN=VAT1 PE=1 SV=2	Q99536	42 kDa	1		1
757		Cluster of T-complex protein 1 subunit zeta OS=Homo sapiens GN=CCT6A PE=1 SV=3 (P40227)	P40227	58 kDa	1		1
757		Proteasome subunit alpha type-3 OS=Homo sapiens GN=PSMA3 PE=1 SV=2	P25788	28 kDa				1	1
757		AP-2 complex subunit sigma OS=Homo sapiens GN=AP2S1 PE=1 SV=2	P53680	17 kDa					2
757		Centromere protein S OS=Homo sapiens GN=APITD1 PE=1 SV=1	Q8N2Z9	16 kDa		2
757		Cluster of Alpha-endosulfine OS=Homo sapiens GN=ENSA PE=1 SV=1 (O43768)	O43768	13 kDa		1	1
757		Malate dehydrogenase, cytoplasmic OS=Homo sapiens GN=MDH1 PE=1 SV=4	P40925	36 kDa	2
757		Glial fibrillary acidic protein OS=Homo sapiens GN=GFAP PE=1 SV=1	P14136	50 kDa				1	1
757		Ras-related protein Rap-1b OS=Homo sapiens GN=RAP1B PE=1 SV=1	P61224	21 kDa	2
757		Protein SET OS=Homo sapiens GN=SET PE=1 SV=3	Q01105	33 kDa		1			1
757		Adenine phosphoribosyltransferase OS=Homo sapiens GN=APRT PE=1 SV=2	P07741	20 kDa	1				1
757		Coatomer subunit beta' OS=Homo sapiens GN=COPB2 PE=1 SV=2	P35606	102 kDa	1	1
757		T-complex protein 1 subunit epsilon OS=Homo sapiens GN=CCT5 PE=1 SV=1	P48643	60 kDa	1		1
757		Cluster of Alpha-centractin OS=Homo sapiens GN=ACTR1A PE=1 SV=1 (P61163)	P61163	43 kDa			2
757		Aspartate--tRNA ligase, cytoplasmic OS=Homo sapiens GN=DARS PE=1 SV=2	P14868	57 kDa	1		1
757		DNA-directed RNA polymerases I, II, and III subunit RPABC1 OS=Homo sapiens GN=POLR2E PE=1 SV=4	P19388	25 kDa		1			1
757		Cytochrome b5 OS=Homo sapiens GN=CYB5A PE=1 SV=2	P00167	15 kDa	1	1
757		Proteasome subunit alpha type-1 OS=Homo sapiens GN=PSMA1 PE=1 SV=1	P25786	30 kDa			2
757		F-actin-capping protein subunit beta OS=Homo sapiens GN=CAPZB PE=1 SV=4	P47756	31 kDa	1				1
757		Q8WXH0-DECOY	Q8WXH0-DECOY	?	1		1
757		Pyruvate dehydrogenase E1 component subunit beta, mitochondrial OS=Homo sapiens GN=PDHB PE=1 SV=3	P11177	39 kDa	1	1
757		NHP2-like protein 1 OS=Homo sapiens GN=NHP2L1 PE=1 SV=3	P55769	14 kDa					2
757		Vinculin OS=Homo sapiens GN=VCL PE=1 SV=4	P18206	124 kDa	2
757		Cell cycle and apoptosis regulator protein 2 OS=Homo sapiens GN=CCAR2 PE=1 SV=2	Q8N163	103 kDa	2
757		Proteasome subunit alpha type-4 OS=Homo sapiens GN=PSMA4 PE=1 SV=1	P25789	29 kDa	1				1
757		Dihydrolipoyl dehydrogenase, mitochondrial OS=Homo sapiens GN=DLD PE=1 SV=2	P09622	54 kDa	1		1
757		Mitochondrial import inner membrane translocase subunit TIM44 OS=Homo sapiens GN=TIMM44 PE=1 SV=2	O43615	51 kDa					2
757		Probable 28S rRNA (cytosine(4447)-C(5))-methyltransferase OS=Homo sapiens GN=NOP2 PE=1 SV=2	P46087	89 kDa	1				1
757		Serine/threonine-protein phosphatase 2A 55 kDa regulatory subunit B alpha isoform OS=Homo sapiens GN=PPP2R2A PE=1 SV=1	P63151	52 kDa		1	1
757		6-pyruvoyl tetrahydrobiopterin synthase OS=Homo sapiens GN=PTS PE=1 SV=1	Q03393	16 kDa				1	1
757		Small acidic protein OS=Homo sapiens GN=SMAP PE=1 SV=1	O00193	20 kDa	1	1
757		U2 small nuclear ribonucleoprotein A' OS=Homo sapiens GN=SNRPA1 PE=1 SV=2	P09661	28 kDa		2
757		ELAV-like protein 1 OS=Homo sapiens GN=ELAVL1 PE=1 SV=2	Q15717	36 kDa		1	1
757		PDZ and LIM domain protein 2 OS=Homo sapiens GN=PDLIM2 PE=1 SV=1	Q96JY6	37 kDa			1	1
757		Serine/threonine-protein phosphatase 2A catalytic subunit beta isoform OS=Homo sapiens GN=PPP2CB PE=1 SV=1	P62714	36 kDa	1				1
757		Serine/threonine-protein phosphatase 2A 65 kDa regulatory subunit A alpha isoform OS=Homo sapiens GN=PPP2R1A PE=1 SV=4	P30153	65 kDa	1	1
757		Cluster of CTP synthase 1 OS=Homo sapiens GN=CTPS1 PE=1 SV=2 (P17812)	P17812	67 kDa		1	1
757		Cluster of UV excision repair protein RAD23 homolog B OS=Homo sapiens GN=RAD23B PE=1 SV=1 (P54727)	P54727 [2]	43 kDa			2
757		Adenylate kinase 2, mitochondrial OS=Homo sapiens GN=AK2 PE=1 SV=2	P54819	26 kDa	1				1
757		Ras-related protein Rab-14 OS=Homo sapiens GN=RAB14 PE=1 SV=4	P61106	24 kDa	1	1
757		Calumenin OS=Homo sapiens GN=CALU PE=1 SV=2	O43852	37 kDa	2
757		Small glutamine-rich tetratricopeptide repeat-containing protein alpha OS=Homo sapiens GN=SGTA PE=1 SV=1	O43765	34 kDa		2
757		Lamin-B2 OS=Homo sapiens GN=LMNB2 PE=1 SV=3	Q03252	68 kDa	2
757		Peptidyl-prolyl cis-trans isomerase-like 4 OS=Homo sapiens GN=PPIL4 PE=1 SV=1	Q8WUA2	57 kDa	1	1
757		THO complex subunit 4 OS=Homo sapiens GN=ALYREF PE=1 SV=3	Q86V81	27 kDa	1		1
757		Epiplakin OS=Homo sapiens GN=EPPK1 PE=1 SV=2	P58107	556 kDa	2
757		Ribosome biogenesis protein BRX1 homolog OS=Homo sapiens GN=BRIX1 PE=1 SV=2	Q8TDN6	41 kDa	2
757		Retinal rod rhodopsin-sensitive cGMP 3',5'-cyclic phosphodiesterase subunit delta OS=Homo sapiens GN=PDE6D PE=1 SV=1	O43924	17 kDa			1	1
757		U5 small nuclear ribonucleoprotein 200 kDa helicase OS=Homo sapiens GN=SNRNP200 PE=1 SV=2	O75643	245 kDa	2
757		Eukaryotic translation initiation factor 3 subunit D OS=Homo sapiens GN=EIF3D PE=1 SV=1	O15371	64 kDa	1	1
757		Protein arginine N-methyltransferase 1 OS=Homo sapiens GN=PRMT1 PE=1 SV=2	Q99873	42 kDa	2
757		Nucleolar GTP-binding protein 1 OS=Homo sapiens GN=GTPBP4 PE=1 SV=3	Q9BZE4	74 kDa	1		1
757		Cluster of Ras-related protein Rab-2A OS=Homo sapiens GN=RAB2A PE=1 SV=1 (P61019)	P61019	24 kDa	1	1
757		NADH dehydrogenase [ubiquinone] 1 alpha subcomplex subunit 7 OS=Homo sapiens GN=NDUFA7 PE=1 SV=3	O95182	13 kDa					2
757		Nucleoplasmin-3 OS=Homo sapiens GN=NPM3 PE=1 SV=3	O75607	19 kDa	2
757		Cell growth-regulating nucleolar protein OS=Homo sapiens GN=LYAR PE=1 SV=2	Q9NX58	44 kDa	2
757		DNA-directed RNA polymerase III subunit RPC9 OS=Homo sapiens GN=CRCP PE=1 SV=1	O75575	17 kDa		2
757		Glutathione reductase, mitochondrial OS=Homo sapiens GN=GSR PE=1 SV=2	P00390	56 kDa					2
757		Ig mu chain C region OS=Homo sapiens GN=IGHM PE=1 SV=3	P01871	49 kDa	2
757		Cytochrome c oxidase subunit 2 OS=Homo sapiens GN=MT-CO2 PE=1 SV=1	P00403	26 kDa	1		1
757		Protein S100-A6 OS=Homo sapiens GN=S100A6 PE=1 SV=1	P06703	10 kDa	1		1
757		Vesicle-associated membrane protein 8 OS=Homo sapiens GN=VAMP8 PE=1 SV=1	Q9BV40	11 kDa					2
757		Heterogeneous nuclear ribonucleoprotein L OS=Homo sapiens GN=HNRNPL PE=1 SV=2	P14866	64 kDa			2
757		Ran-specific GTPase-activating protein OS=Homo sapiens GN=RANBP1 PE=1 SV=1	P43487	23 kDa	2
757		UPF0538 protein C2orf76 OS=Homo sapiens GN=C2orf76 PE=1 SV=3	Q3KRA6	15 kDa					2
757		Pachytene checkpoint protein 2 homolog OS=Homo sapiens GN=TRIP13 PE=1 SV=2	Q15645	49 kDa	2
757		Annexin A11 OS=Homo sapiens GN=ANXA11 PE=1 SV=1	P50995	54 kDa	1	1
757		Mitochondrial intermembrane space import and assembly protein 40 OS=Homo sapiens GN=CHCHD4 PE=1 SV=1	Q8N4Q1	16 kDa	1		1
757		Protein S100-A8 OS=Homo sapiens GN=S100A8 PE=1 SV=1	P05109	11 kDa	2
757		Endoplasmic reticulum resident protein 44 OS=Homo sapiens GN=ERP44 PE=1 SV=1	Q9BS26	47 kDa	2
757		WD repeat-containing protein 1 OS=Homo sapiens GN=WDR1 PE=1 SV=4	O75083	66 kDa	1	1
757		Presequence protease, mitochondrial OS=Homo sapiens GN=PITRM1 PE=1 SV=3	Q5JRX3	117 kDa		2
757		Vesicle transport protein USE1 OS=Homo sapiens GN=USE1 PE=1 SV=2	Q9NZ43	29 kDa			2
757		Synaptogyrin-1 OS=Homo sapiens GN=SYNGR1 PE=1 SV=2	O43759	25 kDa	2
757		Receptor expression-enhancing protein 6 OS=Homo sapiens GN=REEP6 PE=1 SV=1	Q96HR9	21 kDa		2
757		Septin-2 OS=Homo sapiens GN=SEPT2 PE=1 SV=1	Q15019	41 kDa			2
757		Peroxiredoxin-4 OS=Homo sapiens GN=PRDX4 PE=1 SV=1	Q13162	31 kDa	2
757		Staphylococcal nuclease domain-containing protein 1 OS=Homo sapiens GN=SND1 PE=1 SV=1	Q7KZF4	102 kDa			2
757		WD repeat-containing protein 82 OS=Homo sapiens GN=WDR82 PE=1 SV=1	Q6UXN9	35 kDa	2
757		Regulator of G-protein signaling 10 OS=Homo sapiens GN=RGS10 PE=1 SV=2	O43665	20 kDa	2
757		Zinc finger HIT domain-containing protein 3 OS=Homo sapiens GN=ZNHIT3 PE=1 SV=2	Q15649	18 kDa	1	1
757		SAP domain-containing ribonucleoprotein OS=Homo sapiens GN=SARNP PE=1 SV=3	P82979	24 kDa					2
757		Kinesin-like protein KIF2C OS=Homo sapiens GN=KIF2C PE=1 SV=2	Q99661	81 kDa			2
757		Spermidine synthase OS=Homo sapiens GN=SRM PE=1 SV=1	P19623	34 kDa	2
757		Vacuolar protein sorting-associated protein 26A OS=Homo sapiens GN=VPS26A PE=1 SV=2	O75436	38 kDa	2
757		Tail-anchored protein insertion receptor WRB OS=Homo sapiens GN=WRB PE=1 SV=2	O00258	20 kDa	2
757		U6 snRNA-associated Sm-like protein LSm1 OS=Homo sapiens GN=LSM1 PE=1 SV=1	O15116	15 kDa		2
757		RNA polymerase II subunit A C-terminal domain phosphatase OS=Homo sapiens GN=CTDP1 PE=1 SV=3	Q9Y5B0	104 kDa		2
757		High mobility group protein B2 OS=Homo sapiens GN=HMGB2 PE=1 SV=2	P26583	24 kDa	2
757		Cytochrome c oxidase assembly factor 1 homolog OS=Homo sapiens GN=COA1 PE=1 SV=1	Q9GZY4	17 kDa				2
757		Histidine-rich glycoprotein OS=Homo sapiens GN=HRG PE=1 SV=1	P04196	60 kDa			1		1
757		Gasdermin-A OS=Homo sapiens GN=GSDMA PE=1 SV=4	Q96QA5	49 kDa	2
757		Ubiquitin-conjugating enzyme E2 G2 OS=Homo sapiens GN=UBE2G2 PE=1 SV=1	P60604	19 kDa		2
757		Nuclear autoantigen Sp-100 OS=Homo sapiens GN=SP100 PE=1 SV=3	P23497	100 kDa	2
757		Cluster of Eukaryotic peptide chain release factor GTP-binding subunit ERF3B OS=Homo sapiens GN=GSPT2 PE=1 SV=2 (Q8IYD1)	Q8IYD1	69 kDa			2
757		Small ubiquitin-related modifier 1 OS=Homo sapiens GN=SUMO1 PE=1 SV=1	P63165	12 kDa			2
757		DNL-type zinc finger protein OS=Homo sapiens GN=DNLZ PE=1 SV=1	Q5SXM8	19 kDa			2
757		Protein FAM32A OS=Homo sapiens GN=FAM32A PE=1 SV=2	Q9Y421	13 kDa				1	1
757		TSC22 domain family protein 3 OS=Homo sapiens GN=TSC22D3 PE=1 SV=2	Q99576	15 kDa				2
757		DNA-binding protein inhibitor ID-4 OS=Homo sapiens GN=ID4 PE=1 SV=1	P47928	17 kDa	1				1
757		Transmembrane protein 230 OS=Homo sapiens GN=TMEM230 PE=1 SV=1	Q96A57	13 kDa		1	1
757		Fructose-2,6-bisphosphatase TIGAR OS=Homo sapiens GN=TIGAR PE=1 SV=1	Q9NQ88	30 kDa	2
757		Gamma-glutamylaminecyclotransferase OS=Homo sapiens GN=GGACT PE=1 SV=2	Q9BVM4	17 kDa			2
757		Ribonuclease P/MRP protein subunit POP5 OS=Homo sapiens GN=POP5 PE=1 SV=1	Q969H6	19 kDa		2
757		Charged multivesicular body protein 2b OS=Homo sapiens GN=CHMP2B PE=1 SV=1	Q9UQN3	24 kDa			1	1
757		Proteasome subunit beta type-7 OS=Homo sapiens GN=PSMB7 PE=1 SV=1	Q99436	30 kDa	2
757		Cytochrome b-c1 complex subunit 6, mitochondrial OS=Homo sapiens GN=UQCRH PE=1 SV=2	P07919	11 kDa					2
757		Glycine cleavage system H protein, mitochondrial OS=Homo sapiens GN=GCSH PE=1 SV=2	P23434	19 kDa				2
757		Protein Mis18-beta OS=Homo sapiens GN=OIP5 PE=1 SV=2	O43482	25 kDa	2
757		CCAAT/enhancer-binding protein beta OS=Homo sapiens GN=CEBPB PE=1 SV=2	P17676	36 kDa	2
757		Protein Simiate OS=Homo sapiens GN=FAM206A PE=2 SV=1	Q9NX38	20 kDa	2
757		Small nuclear ribonucleoprotein F OS=Homo sapiens GN=SNRPF PE=1 SV=1	P62306	10 kDa	2
757		Translocator protein OS=Homo sapiens GN=TSPO PE=1 SV=3	P30536	19 kDa			2
757		Testin OS=Homo sapiens GN=TES PE=1 SV=1	Q9UGI8	48 kDa	2
757		Galectin-related protein OS=Homo sapiens GN=LGALSL PE=1 SV=2	Q3ZCW2	19 kDa	1		1
757		Migration and invasion enhancer 1 OS=Homo sapiens GN=MIEN1 PE=1 SV=1	Q9BRT3	12 kDa					2
757		H/ACA ribonucleoprotein complex subunit 1 OS=Homo sapiens GN=GAR1 PE=1 SV=1	Q9NY12	22 kDa		2
757		Q6UB99-DECOY	Q6UB99-DECOY	?			2
757		Cluster of Mitotic-spindle organizing protein 2B OS=Homo sapiens GN=MZT2B PE=1 SV=1 (Q6NZ67)	Q6NZ67	16 kDa	2
757		Nuclear transcription factor Y subunit gamma OS=Homo sapiens GN=NFYC PE=1 SV=3	Q13952	50 kDa		2
757		Transmembrane protein 242 OS=Homo sapiens GN=TMEM242 PE=1 SV=1	Q9NWH2	15 kDa			2
757		Serine/threonine-protein kinase OSR1 OS=Homo sapiens GN=OXSR1 PE=1 SV=1	O95747	58 kDa		2
757		Podocalyxin-like protein 2 OS=Homo sapiens GN=PODXL2 PE=1 SV=1	Q9NZ53	65 kDa	2
757		Transmembrane protein 205 OS=Homo sapiens GN=TMEM205 PE=1 SV=1	Q6UW68	21 kDa	2
757		Ubiquitin-conjugating enzyme E2 H OS=Homo sapiens GN=UBE2H PE=1 SV=1	P62256	21 kDa	2
757		Ig kappa chain V-III region SIE OS=Homo sapiens PE=1 SV=1	P01620 (+1)	12 kDa	2
757		Nucleosome assembly protein 1-like 4 OS=Homo sapiens GN=NAP1L4 PE=1 SV=1	Q99733	43 kDa	1		1
757		Mitochondrial inner membrane protein OXA1L OS=Homo sapiens GN=OXA1L PE=1 SV=3	Q15070	49 kDa	2
757		Perilipin-3 OS=Homo sapiens GN=PLIN3 PE=1 SV=3	O60664	47 kDa		2
757		La-related protein 7 OS=Homo sapiens GN=LARP7 PE=1 SV=1	Q4G0J3	67 kDa		2
757		Glioma tumor suppressor candidate region gene 2 protein OS=Homo sapiens GN=GLTSCR2 PE=1 SV=2	Q9NZM5	54 kDa	2
757		Cluster of Epsin-1 OS=Homo sapiens GN=EPN1 PE=1 SV=2 (Q9Y6I3)	Q9Y6I3	60 kDa		2
757		Chromatin accessibility complex protein 1 OS=Homo sapiens GN=CHRAC1 PE=1 SV=1	Q9NRG0	15 kDa				2
757		Zinc finger RNA-binding protein OS=Homo sapiens GN=ZFR PE=1 SV=2	Q96KR1	117 kDa	2
757		Na(+)/H(+) exchange regulatory cofactor NHE-RF1 OS=Homo sapiens GN=SLC9A3R1 PE=1 SV=4	O14745	39 kDa			2
757		PDZ and LIM domain protein 7 OS=Homo sapiens GN=PDLIM7 PE=1 SV=1	Q9NR12	50 kDa	2
757		Glucose-6-phosphate 1-dehydrogenase OS=Homo sapiens GN=G6PD PE=1 SV=4	P11413	59 kDa	2
757		Zinc finger protein 740 OS=Homo sapiens GN=ZNF740 PE=1 SV=1	Q8NDX6	22 kDa	2
757		Q5T7W0-DECOY	Q5T7W0-DECOY	?	2
757		Vesicle-associated membrane protein 7 OS=Homo sapiens GN=VAMP7 PE=1 SV=3	P51809	25 kDa					2
757		RNA-binding protein 25 OS=Homo sapiens GN=RBM25 PE=1 SV=3	P49756	100 kDa		2
757		Protein S100-A9 OS=Homo sapiens GN=S100A9 PE=1 SV=1	P06702	13 kDa			2
757		General transcription factor IIF subunit 2 OS=Homo sapiens GN=GTF2F2 PE=1 SV=2	P13984	28 kDa		2
757		Antileukoproteinase OS=Homo sapiens GN=SLPI PE=1 SV=2	P03973	14 kDa			2
757		Echinoderm microtubule-associated protein-like 4 OS=Homo sapiens GN=EML4 PE=1 SV=3	Q9HC35	109 kDa	2
757		Anamorsin OS=Homo sapiens GN=CIAPIN1 PE=1 SV=2	Q6FI81	34 kDa			2
757		UPF0461 protein C5orf24 OS=Homo sapiens GN=C5orf24 PE=1 SV=1	Q7Z6I8	20 kDa			2
757		Protein FAM49B OS=Homo sapiens GN=FAM49B PE=1 SV=1	Q9NUQ9	37 kDa		2
757		MKI67 FHA domain-interacting nucleolar phosphoprotein OS=Homo sapiens GN=NIFK PE=1 SV=1	Q9BYG3	34 kDa		2
757		Alpha-1-antichymotrypsin OS=Homo sapiens GN=SERPINA3 PE=1 SV=2	P01011	48 kDa	2
757		Bcl10-interacting CARD protein OS=Homo sapiens GN=C9orf89 PE=1 SV=1	Q96LW7	26 kDa	2
757		LisH domain-containing protein FOPNL OS=Homo sapiens GN=FOPNL PE=1 SV=1	Q96NB1	20 kDa	2
757		Zinc finger CCCH-type with G patch domain-containing protein OS=Homo sapiens GN=ZGPAT PE=1 SV=3	Q8N5A5	57 kDa			2
757		Y-box-binding protein 3 OS=Homo sapiens GN=YBX3 PE=1 SV=4	P16989	40 kDa	2
757		NADPH--cytochrome P450 reductase OS=Homo sapiens GN=POR PE=1 SV=2	P16435	77 kDa	2
757		Sterile alpha motif domain-containing protein 12 OS=Homo sapiens GN=SAMD12 PE=2 SV=2	Q8N8I0	23 kDa	2
757		Methylmalonyl-CoA epimerase, mitochondrial OS=Homo sapiens GN=MCEE PE=1 SV=1	Q96PE7	19 kDa			2
757		Dolichyl-diphosphooligosaccharide--protein glycosyltransferase subunit STT3B OS=Homo sapiens GN=STT3B PE=1 SV=1	Q8TCJ2	94 kDa	2
757		Zinc finger protein 428 OS=Homo sapiens GN=ZNF428 PE=1 SV=2	Q96B54	20 kDa	2
757		N-alpha-acetyltransferase 38, NatC auxiliary subunit OS=Homo sapiens GN=NAA38 PE=1 SV=1	Q9BRA0	14 kDa					2
757		Signal recognition particle receptor subunit alpha OS=Homo sapiens GN=SRPR PE=1 SV=2	P08240	70 kDa		2
757		RNA-binding Raly-like protein OS=Homo sapiens GN=RALYL PE=2 SV=2	Q86SE5	32 kDa	2
757		Cluster of Myosin light chain 3 OS=Homo sapiens GN=MYL3 PE=1 SV=3 (P08590)	P08590	22 kDa				2
757		HLA class I histocompatibility antigen, A-24 alpha chain OS=Homo sapiens GN=HLA-A PE=1 SV=2	P05534 (+1)	41 kDa	2
945		Msx2-interacting protein OS=Homo sapiens GN=SPEN PE=1 SV=1	Q96T58	402 kDa					1
945		Fascin OS=Homo sapiens GN=FSCN1 PE=1 SV=3	Q16658	55 kDa	1
945		Long-chain-fatty-acid--CoA ligase 1 OS=Homo sapiens GN=ACSL1 PE=1 SV=1	P33121	78 kDa	1
945		Cluster of Serine/arginine-rich splicing factor 6 OS=Homo sapiens GN=SRSF6 PE=1 SV=2 (Q13247)	Q13247 [2]	40 kDa	1
945		ATP-binding cassette sub-family E member 1 OS=Homo sapiens GN=ABCE1 PE=1 SV=1	P61221	67 kDa					1
945		Acetyl-CoA acetyltransferase, mitochondrial OS=Homo sapiens GN=ACAT1 PE=1 SV=1	P24752	45 kDa					1
945		Eukaryotic translation initiation factor 3 subunit I OS=Homo sapiens GN=EIF3I PE=1 SV=1	Q13347	37 kDa					1
945		SUMO-activating enzyme subunit 1 OS=Homo sapiens GN=SAE1 PE=1 SV=1	Q9UBE0	38 kDa		1
945		Hypoxanthine-guanine phosphoribosyltransferase OS=Homo sapiens GN=HPRT1 PE=1 SV=2	P00492	25 kDa	1
945		Eukaryotic translation initiation factor 3 subunit L OS=Homo sapiens GN=EIF3L PE=1 SV=1	Q9Y262	67 kDa		1
945		Phosphoserine aminotransferase OS=Homo sapiens GN=PSAT1 PE=1 SV=2	Q9Y617	40 kDa	1
945		2'-deoxynucleoside 5'-phosphate N-hydrolase 1 OS=Homo sapiens GN=DNPH1 PE=1 SV=1	O43598	19 kDa	1
945		Mitochondrial-processing peptidase subunit alpha OS=Homo sapiens GN=PMPCA PE=1 SV=2	Q10713	58 kDa		1
945		mRNA turnover protein 4 homolog OS=Homo sapiens GN=MRTO4 PE=1 SV=2	Q9UKD2	28 kDa					1
945		Mitotic checkpoint protein BUB3 OS=Homo sapiens GN=BUB3 PE=1 SV=1	O43684	37 kDa	1
945		Transmembrane emp24 domain-containing protein 2 OS=Homo sapiens GN=TMED2 PE=1 SV=1	Q15363	23 kDa	1
945		Argininosuccinate synthase OS=Homo sapiens GN=ASS1 PE=1 SV=2	P00966	47 kDa			1
945		Collagen alpha-1(VI) chain OS=Homo sapiens GN=COL6A1 PE=1 SV=3	P12109	109 kDa		1
945		Membrane-associated progesterone receptor component 1 OS=Homo sapiens GN=PGRMC1 PE=1 SV=3	O00264	22 kDa	1
945		Q14152-DECOY	Q14152-DECOY	?				1
945		Apolipoprotein D OS=Homo sapiens GN=APOD PE=1 SV=1	P05090	21 kDa	1
945		Nucleolar RNA helicase 2 OS=Homo sapiens GN=DDX21 PE=1 SV=5	Q9NR30	87 kDa		1
945		Biogenesis of lysosome-related organelles complex 1 subunit 2 OS=Homo sapiens GN=BLOC1S2 PE=1 SV=1	Q6QNY1	16 kDa		1
945		Cluster of Serine/threonine-protein phosphatase PP1-gamma catalytic subunit OS=Homo sapiens GN=PPP1CC PE=1 SV=1 (P36873)	P36873 [2]	37 kDa					1
945		Protein-L-isoaspartate(D-aspartate) O-methyltransferase OS=Homo sapiens GN=PCMT1 PE=1 SV=4	P22061	25 kDa			1
945		Splicing factor 3B subunit 6 OS=Homo sapiens GN=SF3B6 PE=1 SV=1	Q9Y3B4	15 kDa					1
945		ADP-ribosylation factor-like protein 6-interacting protein 4 OS=Homo sapiens GN=ARL6IP4 PE=1 SV=2	Q66PJ3	45 kDa	1
945		Glutathione S-transferase Mu 3 OS=Homo sapiens GN=GSTM3 PE=1 SV=3	P21266	27 kDa		1
945		Q9UID3-DECOY	Q9UID3-DECOY	?	1
945		AP-1 complex subunit beta-1 OS=Homo sapiens GN=AP1B1 PE=1 SV=2	Q10567	105 kDa			1
945		Cleavage and polyadenylation specificity factor subunit 5 OS=Homo sapiens GN=NUDT21 PE=1 SV=1	O43809	26 kDa				1
945		DnaJ homolog subfamily C member 7 OS=Homo sapiens GN=DNAJC7 PE=1 SV=2	Q99615	56 kDa	1
945		Transportin-1 OS=Homo sapiens GN=TNPO1 PE=1 SV=2	Q92973	102 kDa		1
945		Clathrin interactor 1 OS=Homo sapiens GN=CLINT1 PE=1 SV=1	Q14677	68 kDa		1
945		Phosphomevalonate kinase OS=Homo sapiens GN=PMVK PE=1 SV=3	Q15126	22 kDa					1
945		Tumor protein D52 OS=Homo sapiens GN=TPD52 PE=1 SV=2	P55327	24 kDa	1
945		Non-specific lipid-transfer protein OS=Homo sapiens GN=SCP2 PE=1 SV=2	P22307	59 kDa	1
945		ATP-dependent 6-phosphofructokinase, muscle type OS=Homo sapiens GN=PFKM PE=1 SV=2	P08237	85 kDa	1
945		26S proteasome non-ATPase regulatory subunit 4 OS=Homo sapiens GN=PSMD4 PE=1 SV=1	P55036	41 kDa					1
945		Actin-related protein 2/3 complex subunit 2 OS=Homo sapiens GN=ARPC2 PE=1 SV=1	O15144	34 kDa		1
945		Myosin-10 OS=Homo sapiens GN=MYH10 PE=1 SV=3	P35580	229 kDa			1
945		Enoyl-CoA delta isomerase 1, mitochondrial OS=Homo sapiens GN=ECI1 PE=1 SV=1	P42126	33 kDa		1
945		Stress-induced-phosphoprotein 1 OS=Homo sapiens GN=STIP1 PE=1 SV=1	P31948	63 kDa	1
945		Proteasome subunit alpha type-2 OS=Homo sapiens GN=PSMA2 PE=1 SV=2	P25787	26 kDa	1
945		Cluster of Ras-related protein Rab-6B OS=Homo sapiens GN=RAB6B PE=1 SV=1 (Q9NRW1)	Q9NRW1 [2]	23 kDa		1
945		DNA-directed RNA polymerase II subunit RPB9 OS=Homo sapiens GN=POLR2I PE=1 SV=1	P36954	15 kDa					1
945		Microsomal glutathione S-transferase 1 OS=Homo sapiens GN=MGST1 PE=1 SV=1	P10620	18 kDa				1
945		Eukaryotic translation initiation factor 3 subunit H OS=Homo sapiens GN=EIF3H PE=1 SV=1	O15372	40 kDa		1
945		Proteasome subunit beta type-3 OS=Homo sapiens GN=PSMB3 PE=1 SV=2	P49720	23 kDa	1
945		Leucine-rich repeat-containing protein 47 OS=Homo sapiens GN=LRRC47 PE=1 SV=1	Q8N1G4	63 kDa	1
945		Ribonuclease P protein subunit p20 OS=Homo sapiens GN=POP7 PE=1 SV=2	O75817	16 kDa		1
945		PDZ domain-containing protein 11 OS=Homo sapiens GN=PDZD11 PE=1 SV=2	Q5EBL8	16 kDa			1
945		Phenylalanine--tRNA ligase beta subunit OS=Homo sapiens GN=FARSB PE=1 SV=3	Q9NSD9	66 kDa	1
945		Protein RCC2 OS=Homo sapiens GN=RCC2 PE=1 SV=2	Q9P258	56 kDa	1
945		Nardilysin OS=Homo sapiens GN=NRD1 PE=1 SV=2	O43847	132 kDa			1
945		Serine/arginine-rich splicing factor 5 OS=Homo sapiens GN=SRSF5 PE=1 SV=1	Q13243	31 kDa	1
945		Vesicle-associated membrane protein 4 OS=Homo sapiens GN=VAMP4 PE=1 SV=2	O75379	16 kDa	1
945		NADH dehydrogenase [ubiquinone] 1 alpha subcomplex subunit 6 OS=Homo sapiens GN=NDUFA6 PE=1 SV=3	P56556	18 kDa					1
945		Nuclear receptor 2C2-associated protein OS=Homo sapiens GN=NR2C2AP PE=1 SV=1	Q86WQ0	16 kDa					1
945		Mediator of RNA polymerase II transcription subunit 21 OS=Homo sapiens GN=MED21 PE=1 SV=1	Q13503	16 kDa			1
945		Selenoprotein T OS=Homo sapiens GN=SELT PE=2 SV=2	P62341	22 kDa		1
945		Serine hydroxymethyltransferase, mitochondrial OS=Homo sapiens GN=SHMT2 PE=1 SV=3	P34897	56 kDa	1
945		Lymphokine-activated killer T-cell-originated protein kinase OS=Homo sapiens GN=PBK PE=1 SV=3	Q96KB5	36 kDa			1
945		PCNA-associated factor OS=Homo sapiens GN=KIAA0101 PE=1 SV=1	Q15004	12 kDa			1
945		NTF2-related export protein 1 OS=Homo sapiens GN=NXT1 PE=1 SV=1	Q9UKK6	16 kDa				1
945		Glutaredoxin-3 OS=Homo sapiens GN=GLRX3 PE=1 SV=2	O76003	37 kDa		1
945		Nucleoporin-like protein 2 OS=Homo sapiens GN=NUPL2 PE=1 SV=1	O15504	45 kDa			1
945		Ubiquitin-conjugating enzyme E2 D2 OS=Homo sapiens GN=UBE2D2 PE=1 SV=1	P62837	17 kDa					1
945		Protein pelota homolog OS=Homo sapiens GN=PELO PE=1 SV=2	Q9BRX2	43 kDa					1
945		V-type proton ATPase subunit G 1 OS=Homo sapiens GN=ATP6V1G1 PE=1 SV=3	O75348	14 kDa					1
945		DET1- and DDB1-associated protein 1 OS=Homo sapiens GN=DDA1 PE=1 SV=1	Q9BW61	12 kDa					1
945		Protein DPCD OS=Homo sapiens GN=DPCD PE=1 SV=2	Q9BVM2	23 kDa					1
945		Dr1-associated corepressor OS=Homo sapiens GN=DRAP1 PE=1 SV=3	Q14919	22 kDa					1
945		Prolyl endopeptidase OS=Homo sapiens GN=PREP PE=1 SV=2	P48147	81 kDa			1
945		Heterogeneous nuclear ribonucleoprotein A0 OS=Homo sapiens GN=HNRNPA0 PE=1 SV=1	Q13151	31 kDa		1
945		Zinc finger CCCH-type antiviral protein 1 OS=Homo sapiens GN=ZC3HAV1 PE=1 SV=3	Q7Z2W4	101 kDa	1
945		Q6QHF9-DECOY	Q6QHF9-DECOY	?			1
945		ATP-dependent 6-phosphofructokinase, platelet type OS=Homo sapiens GN=PFKP PE=1 SV=2	Q01813	86 kDa		1
945		Inositol monophosphatase 1 OS=Homo sapiens GN=IMPA1 PE=1 SV=1	P29218	30 kDa	1
945		Cyclin-dependent kinase inhibitor 2A, isoform 4 OS=Homo sapiens GN=CDKN2A PE=1 SV=2	Q8N726	14 kDa			1
945		Probable ergosterol biosynthetic protein 28 OS=Homo sapiens GN=C14orf1 PE=1 SV=1	Q9UKR5	16 kDa					1
945		Regulation of nuclear pre-mRNA domain-containing protein 1B OS=Homo sapiens GN=RPRD1B PE=1 SV=1	Q9NQG5	37 kDa	1
945		CDGSH iron-sulfur domain-containing protein 1 OS=Homo sapiens GN=CISD1 PE=1 SV=1	Q9NZ45	12 kDa					1
945		Methyltransferase-like protein 7A OS=Homo sapiens GN=METTL7A PE=1 SV=1	Q9H8H3	28 kDa		1
945		Intraflagellar transport protein 20 homolog OS=Homo sapiens GN=IFT20 PE=1 SV=1	Q8IY31	15 kDa					1
945		DNA-directed RNA polymerase II subunit RPB7 OS=Homo sapiens GN=POLR2G PE=1 SV=1	P62487	19 kDa	1
945		Delta(3,5)-Delta(2,4)-dienoyl-CoA isomerase, mitochondrial OS=Homo sapiens GN=ECH1 PE=1 SV=2	Q13011	36 kDa	1
945		Platelet-activating factor acetylhydrolase IB subunit alpha OS=Homo sapiens GN=PAFAH1B1 PE=1 SV=2	P43034	47 kDa	1
945		PRA1 family protein 3 OS=Homo sapiens GN=ARL6IP5 PE=1 SV=1	O75915	22 kDa	1
945		UPF0449 protein C19orf25 OS=Homo sapiens GN=C19orf25 PE=1 SV=2	Q9UFG5	13 kDa					1
945		Nuclear nucleic acid-binding protein C1D OS=Homo sapiens GN=C1D PE=1 SV=1	Q13901	16 kDa			1
945		Protein dpy-30 homolog OS=Homo sapiens GN=DPY30 PE=1 SV=1	Q9C005	11 kDa				1
945		Adenylosuccinate synthetase isozyme 2 OS=Homo sapiens GN=ADSS PE=1 SV=3	P30520	50 kDa	1
945		ATP-dependent RNA helicase DDX19A OS=Homo sapiens GN=DDX19A PE=1 SV=1	Q9NUU7 (+1)	54 kDa		1
945		MORF4 family-associated protein 1 OS=Homo sapiens GN=MRFAP1 PE=1 SV=1	Q9Y605	15 kDa		1
945		Ribonuclease UK114 OS=Homo sapiens GN=HRSP12 PE=1 SV=1	P52758	14 kDa					1
945		Ubiquitin-conjugating enzyme E2 D3 OS=Homo sapiens GN=UBE2D3 PE=1 SV=1	P61077	17 kDa					1
945		HRAS-like suppressor 3 OS=Homo sapiens GN=PLA2G16 PE=1 SV=2	P53816	18 kDa	1
945		Adrenodoxin, mitochondrial OS=Homo sapiens GN=FDX1 PE=1 SV=1	P10109	19 kDa					1
945		Small integral membrane protein 13 OS=Homo sapiens GN=SMIM13 PE=3 SV=1	P0DJ93	10 kDa		1
945		Membrane magnesium transporter 1 OS=Homo sapiens GN=MMGT1 PE=1 SV=1	Q8N4V1	15 kDa					1
945		PDZ and LIM domain protein 5 OS=Homo sapiens GN=PDLIM5 PE=1 SV=5	Q96HC4	64 kDa	1
945		Secretoglobin family 1D member 2 OS=Homo sapiens GN=SCGB1D2 PE=2 SV=1	O95969	10 kDa			1
945		Peptidyl-prolyl cis-trans isomerase FKBP1B OS=Homo sapiens GN=FKBP1B PE=1 SV=2	P68106	12 kDa					1
945		3-hydroxybutyrate dehydrogenase type 2 OS=Homo sapiens GN=BDH2 PE=1 SV=2	Q9BUT1	27 kDa			1
